## Within-cycle instantaneous frequency profiles report oscillatory waveform dynamics.

Andrew J. Quinn<sup>1,†</sup>, Vítor Lopes-dos-Santos<sup>2</sup>, Norden Huang<sup>3,4,5</sup>,  
Wei-Kuang Liang<sup>5,6</sup>, Chi-Hung Juan<sup>5,6</sup>, Jia-Rong Yeh<sup>4,5</sup>,  
Anna C. Nobre<sup>1,7</sup>, David Dupret<sup>2</sup> & Mark W. Woolrich<sup>1</sup>

<sup>1</sup> Oxford Centre for Human Brain Activity, Wellcome Centre for Integrative Neuroimaging, Department of Psychiatry, University of Oxford, OX3 7JX. UK.

<sup>2</sup> Medical Research Council Brain Network Dynamics Unit, Nuffield Department of Clinical Neurosciences, University of Oxford, Oxford, OX1 3TH, UK.

<sup>3</sup> Data Analysis and Application Laboratory, Innovation Centre, The First Institute of Oceanography, Qingdao, China

<sup>4</sup> Pilot National Laboratory for Marine Science and Technology, Qingdao, China.

<sup>5</sup> Cognitive Intelligence and Precision Healthcare Centre, National Central University, Taiwan

<sup>6</sup> Institute of Cognitive Neuroscience, National Central University, Taoyuan City, Taiwan.

<sup>7</sup> Department of Experimental Psychology, University of Oxford, Oxford. OX2 6GG. UK.

<sup>†</sup>correspondence: [andrew.quinn@psych.ox.ac.uk](mailto:andrew.quinn@psych.ox.ac.uk)

**Abstract:** Non-sinusoidal waveform is emerging as an important feature of neuronal oscillations. However, the role of single cycle shape dynamics in rapidly unfolding brain activity remains unclear. Here, we develop an analytical framework that isolates oscillatory signals from time-series using masked Empirical Mode Decomposition to quantify dynamical changes in the shape of individual cycles (along with amplitude, frequency and phase) using instantaneous frequency. We show how phase-alignment, a process of projecting cycles into a regularly sampled phase-grid space, makes it possible to compare cycles of different durations and shapes. ‘Normalised shapes’ can then be constructed with high temporal detail whilst accounting for differences in both duration and amplitude. We find that the instantaneous frequency tracks non-sinusoidal shapes in both simulated and real data. Notably, in local field potential recordings of mouse hippocampal CA1, we find that theta oscillations have a stereotyped slow-descending slope in the cycle-wise average, yet exhibiting high variability on a cycle-by-cycle basis. We show how Principal Components Analysis allows identification of motifs of theta cycle waveform that have distinct associations to cycle amplitude, cycle duration and animal movement speed. By allowing investigation into oscillation shape at high temporal resolution, this analytical framework will open new lines of enquiry into how neuronal oscillations support moment-by-moment information processing and integration in brain networks.

# 1: Introduction

Frequency, phase and amplitude have long been reported as important features of neuronal oscillations with behavioural and electrophysiological relevance. Furthermore, neuronal oscillations show non-sinusoidal waveform shapes that span a wide range of spatial and temporal scales (Cole and Voytek, 2017). Whilst waveform shape is emerging as a fourth relevant feature of neuronal oscillations, many theories of neuronal oscillations currently assume sinusoidal waveforms. This might be due to the fact that characterising and quantifying non-sinusoidal waveforms remains a substantial analytic challenge (Amzica and Steriade, 1998; Cole and Voytek, 2017). To uncover the role of waveform dynamics in rapidly unfolding brain activity, there is a growing need for novel analysis methods that are able to characterise a wide range of waveform shape features at the single-cycle level.

Waveform shape related parameters, such as skewness or asymmetry, can be estimated from higher order Fourier spectra such as the bispectrum or bicoherence (Bartz et al., 2019; Elgar, 1987; Sheremet et al., 2016). These methods require relatively long data segments to have high frequency resolution, and therefore do not provide single-cycle estimates. Alternatively, a set of waveform features for individual cycles can be described by the relative durations of different quartiles of a cycle (Belluscio et al., 2012; Cole and Voytek, 2019; Trimper et al., 2014). Whilst this approach is tractable on single cycles, the extracted features must be defined *a priori* and are limited to the resolution of the selected cycle control points such as the extrema and zero-crossings.

The temporal dynamics in oscillatory frequency can be quantified for a given waveform by its instantaneous frequency computed from the differential of the signal's instantaneous phase (Boashash, 1992; Huang et al., 2009). Such instantaneous frequency estimates have been used previously in electrophysiology to explore dynamics in oscillatory peak frequency at high temporal resolution (Cohen, 2014; Liang et al., 2005; Nelli et al., 2017; Rudrauf et al., 2006). Crucially, any non-sinusoidal waveform features in an oscillation will lead to within-cycle instantaneous frequency modulations in which the frequency of an oscillation changes from moment-to-moment within a single cycle (Huang et al., 1998). The degree of non-linearity of an oscillation is related to the total amount of within-cycle frequency modulation (Huang et al., 2014; Tsai et al., 2016; Wang et al., 2012; Yeh et al., 2020).

We introduce a novel approach which creates smooth waveform shape profiles that describe non-sinusoidal features in single cycles with high temporal detail. To this end, we first operationalise waveform shape as the profile of instantaneous frequency across the cycle's instantaneous phase. We then identify when and how an ongoing cycle deviates from a sinusoidal waveform by identifying points in the cycle where instantaneous frequency departs from a flat profile. For example, a cycle with a wide peak has a relatively low instantaneous frequency around the peak, and a cycle with a fast-ascending edge will have a relatively high instantaneous frequency between the trough and peak. In order to allow between cycle comparisons, we also need to account for how different cycles of an oscillation will play out

44 at different speeds, leading to differences in extrema timing and overall duration. To  
45 overcome these problems, we introduce the process of ‘phase-alignment’ which reregisters  
46 the instantaneous frequency profiles onto a regularly sampled set of points in phase. To  
47 obtain the instantaneous phase time course of each cycle, we use the Empirical Mode  
48 Decomposition (EMD). EMD decomposes the time-series of interest into its oscillatory  
49 modes (Intrinsic Mode Functions; IMFs) that retain the non-stationary and non-linear signal  
50 features.

51

52 We outline and validate our novel approach in simulated data before applying it to theta-band  
53 oscillations recorded in the local field potentials (LFPs) of the mouse hippocampal CA1  
54 during active exploratory behaviour. The hippocampal theta rhythm has a characteristic non-  
55 sinusoidal waveform shape (Belluscio et al., 2012; Buzsáki et al., 1985; Siapas et al., 2005)  
56 that is modulated by movement (Sheremet et al., 2016) and changes in sleep or drug states  
57 (Buzsáki et al., 1985). Using EMD to identify the theta rhythm, we show that phase-aligned  
58 instantaneous frequency is able to robustly characterise a continuous waveform shape profile  
59 for hippocampal theta. The results confirm the stereotyped fast-ascending and slow-  
60 descending shape in the cycle-wise average. Additionally, it reveals but with high amounts of  
61 shape variation across single cycles of theta, which we describe using a set of data-driven  
62 shape ‘motifs’. Finally, we find that cycle-level shape motifs have differential associations  
63 with theta amplitude, theta cycle duration and mouse movement speed. Overall, we  
64 demonstrate that behaviourally relevant dynamics in single-cycle oscillatory waveforms can  
65 be accurately and intuitively explored with phase-aligned instantaneous frequency profiles.

## 66 **2: Methods**

67

### 68 **2.1: Data and Code Availability Statement**

69

70 Code for the analyses in this paper are freely available online ([https://github.com/OHBA-](https://github.com/OHBA-analysis/Quinn2021_Waveform)  
71 [analysis/Quinn2021\\_Waveform](https://github.com/OHBA-analysis/Quinn2021_Waveform)) and data are available from the MRC BNDU Data Sharing  
72 Platform (<https://data.mrc.ox.ac.uk/data-set/instantaneous-frequency-profiles-theta-cycles>;  
73 requires free registration). The analyses in this study were carried out in python 3.7 using  
74 v0.4.0 of the EMD package (Quinn et al., 2021; <https://emd.readthedocs.io/>) and glmtools  
75 v0.1.0 for General Linear Model design and fitting (<https://pypi.org/project/glmtools/>). The  
76 wavelet transforms and principal components analysis were computed using SAILS v1.1.1  
77 (Quinn and Hymers, 2020). The underlying python dependencies were numpy (Harris et al.,  
78 2020) and scipy (SciPy 1.0 Contributors et al., 2020) for computation and matplotlib (Hunter,  
79 2007) for visualisation.

80

### 81 **2.2: Masked Empirical Mode Methods**

82

83 The EMD is implemented as a sifting algorithm that incrementally extracts the highest  
84 frequency features of a time-series into its oscillatory components known as IMFs (Huang et  
85 al., 1998). Once identified, the IMF is subtracted from the signal and the sifting process  
86 repeated to find the next fastest set of oscillatory dynamics. This process is iterated through  
87 until only a residual trend remains in the dataset, constituting the very slowest dynamics of  
88 the signal.

89

90 Transient or intermittent oscillatory signals can lead to a mix of different frequency  
91 components appearing in a single IMF; an issue known as mode mixing (Deering and Kaiser,  
92 2005; Wu and Huang, 2009). To reduce mode mixing, we use an adapted version of the mask  
93 sift (Deering and Kaiser, 2005; Tsai et al., 2016). The mEMD involves the same core process  
94 as the original sift outlined above. However, at each iteration, a masking signal is added to  
95 the data before all the extrema (maxima and minima) in the masked signal are identified. An  
96 upper and lower amplitude envelope is then estimated by interpolating between the maxima  
97 and minima respectively. The average of the upper and lower envelope is subtracted from the  
98 data and the extrema identification, envelope interpolation and subtraction repeated until the  
99 average of the upper and lower envelopes are close to zero. The mask is then subtracted from  
100 the signal to return the IMF.

101

102 The performance of the sift is limited by a number of factors such as accuracy in peak  
103 detection and overshoot or edge effects in the envelope interpolation. As such, when applied  
104 to real data, the sift may not always perfectly isolate individual oscillations. To prevent  
105 envelope overshoot we used a monotonic PCHIP (Piecewise Cubic Hermite Interpolating  
106 Polynomial; implemented in `scipy.interpolation.PChipInterpolator`) interpolation during the  
107 sifting. The monotonic PCHIP interpolation avoids overshoot of the amplitude envelopes  
108 where the data are not completely smooth. When compared to a cubic-spline interpolation,

109 this reduces instances where the envelopes become very large, or the upper and lower  
110 envelopes cross over.

111

112 2.2.1: Frequency Transformation

113

114 The analytic form of each IMF was constructed using the Hilbert transform and the  
115 instantaneous phase set as the angle of the analytic form on the complex plane (See figure 2C  
116 for an example). To attenuate noise in the phase estimation, the unwrapped phase time-course  
117 was smoothed using a Savitsky-Golay filter (`scipy.signal.savgol_filter`; order = 1, window  
118 size = 3 samples). The instantaneous frequency (See figure 2D for an example) in Hertz is  
119 then computed from the derivative of this unwrapped phase:

120

$$121 \quad IF = \frac{fs}{2\pi} \frac{d\phi(t)}{dt}$$

122

123 Where  $fs$  is the sampling frequency and  $\phi(t)$  is the unwrapped instantaneous phase time-  
124 course. The instantaneous amplitude time-course is computed as the absolute value of the  
125 analytic form of each IMF.

126

127 The distribution of instantaneous amplitude values by frequency or time and frequency can  
128 be computed from these instantaneous frequency metrics. A sparse matrix  $H \in \mathbb{R}^{(T \times F)}$  is  
129 filled with the instantaneous amplitudes value from the IMFs at their respective time and  
130 frequency co-ordinates. This matrix is the Hilbert-Huang Transform (HHT; See figure 2E for  
131 an example) and provides an alternative time-frequency transform to traditional Fourier based  
132 methods such as the short-time Fourier transform and the wavelet transform (Huang et al.,  
133 1998).

134

135 2.2.2: Cycle Detection

136

137 The next stage is to segment the IMFs into their constituent cycles and identify which cycles  
138 will be included in further analysis. The start and end of theta cycles are located by the  
139 differentials greater than six in the phase. The start and end point of cycles in this paper is the  
140 ascending zero-crossing as this occurs at the point where the phase time-course wraps. Once  
141 identified, some cycles will be ‘bad’ in the sense that the oscillation captured by the IMF is  
142 not well represented, e.g., because the rhythm is not present over that time period or it is  
143 poorly estimated, and will be excluded from subsequent analyses. This is important for  
144 instantaneous frequency analyses as the differentiation step (see section 2.2.1) can be very  
145 noise sensitive. Included cycles are identified from the wrapped instantaneous phase time-  
146 course of the IMF containing the oscillation to be analysed. As the instantaneous phase  
147 computation via the Hilbert transform returns a value for every sample regardless of whether  
148 a prominent rhythm is present, only ‘good’ theta cycles are retained for further analysis. A  
149 good cycle is defined as having a phase with a strictly positive differential (i.e., no phase

150 reversals) that starts with a value  $0 \leq x \leq \pi/24$  and end within  $2\pi - \pi/24 \leq x \leq 2\pi$  and 4 control  
151 points (peak, trough, ascending edge and descending edge).

152

153 2.2.3: Control Point analysis

154

155 One approach to quantify oscillatory waveforms is to base analyses around parts of the cycle  
156 which can be straightforwardly identified in all cycles (Belluscio et al., 2012; Cole and  
157 Voytek, 2019). For example, the peak, trough, ascending zero-crossing and descending zero-  
158 crossings of a cycle can define a set of control points describing the relative timing of  
159 inflections and mid-points in a cycle. In the present analyses, the extrema (peaks and troughs)  
160 are detected by finding zero-crossings in the differential of an IMF. This initial extrema  
161 estimate is limited by the sampling frequency of the dataset and is refined using parabolic  
162 interpolation (Rato et al., 2008). The zero-crossings are initially identified from sign changes  
163 in the IMF time-course and refined by linear interpolation. The ratio of temporal durations  
164 between these control points can describe large scale shape features. Finally, we compute the  
165 peak-to-trough ratio and the ascent-to-descent ratios for each cycle (Cole and Voytek, 2019).

166

167 2.2.4: Phase-alignment

168

169 We present an alternative approach to control points that ensures that entire waveform  
170 profiles can be combined and/or compared across cycles despite cycle-by-cycle differences in  
171 progression rate and overall duration. To compare waveforms across cycles that play out at  
172 different speeds, we use phase-alignment to register cycles onto a common grid. Phase  
173 alignment is performed on the instantaneous phase of a cycle and a measure of interest, such  
174 as the instantaneous frequency, which is observed at the same time-intervals. A linear one-  
175 dimensional interpolation function is fitted between the instantaneous phase (as x values) and  
176 the instantaneous frequency (as y values). The interpolation function is evaluated on a  
177 template set of instantaneous phase values with a linear spacing between 0 and  $2\pi$ , if any  
178 points in the template fall outside the fitted range, the interpolator returns an extrapolated  
179 value. This interpolated version of instantaneous frequency is then directly comparable across  
180 cycles as each point in the phase will occur at the same time. We compute phase-alignment  
181 using a linear interpolation across 48 fixed points across the zero to  $2\pi$  phase range.

182

183 Once an instantaneous frequency profile has been phase aligned, we can visualise a  
184 normalised waveform by projecting the frequency content back to a phase-time course. This  
185 is achieved by re-normalising the instantaneous frequency from Hertz back to radians in  
186 order to create a profile of successive phase differences. The phase time-course is then  
187 reconstructed from the cumulative summation of these phase differences. An oscillatory  
188 waveform can then be computed by taking the sine transform of this phase time-course. The  
189 resulting waveform has an amplitude of one and a consistent time-axis for all cycles. This  
190 ‘normalised waveform’ allows for visualisation of shape between cycles with different  
191 durations and amplitudes.



192 2.2.5: Describing shape an instantaneous frequency mean vector

193

194 A simplified summary of a cycle's shape can be computed from a mean-vector of the phase  
195 aligned instantaneous frequency according to the following equation:

196

197

$$MV = \overline{IF} e^{i\overline{\phi}}$$

198

199 Where  $\overline{\phi}$  is the uniform phase-grid used in phase-alignment and  $\overline{IF}$  is the phase-aligned  
200 instantaneous frequency. This is similar to the mean-vector approach to computing phase-  
201 amplitude-coupling (Canolty et al., 2006). The mean-vector of a sinusoidal cycle will be zero  
202 whilst a non-sinusoidal cycle will return a complex value whose angle indicates which phase  
203 has the highest instantaneous frequency and the magnitude indicates the extent of the  
204 frequency modulation through the cycle. This method provides a straightforward summary  
205 but is only sensitive to unimodal deviations from a flat instantaneous frequency profile.

206

207 2.2.6: Principal Components shape motifs.

208

209 A more complete, data-driven approach to summarising shape from instantaneous frequency  
210 uses Principal Components Analysis (PCA) to identify the principal modes of variation in  
211 shape across the included cycles. Phase-aligned cycles are concatenated into a single matrix  
212 of size [nphases x ncycles]. The second dimension of this matrix is reduced to by PCA. This  
213 results in an [nphases x ncomponents] matrix of shape 'motifs' defined by the distribution of  
214 component weights across phase and an [ncomponents x ncycles] matrix of PC scores  
215 indicating the presence of each component motif in each individual cycle.

216

217 The component motif matrix defines the axes of variability in waveform shape across cycles.  
218 The shapes captured along each of these axes are visualised by defining a set of PC scores  
219 containing the maximum or minimum observed score for the PC in question and zeros for all  
220 others. These scores can be projected back into the original data space to provide exemplar  
221 instantaneous frequency profiles for both extremes of the PC axes. Finally, these exemplar IF  
222 profiles can be projected back into the time-domain to generate a normalised waveform that  
223 preserves the shape depicted in the exemplar IF profiles.

224

## 225 **2.3: Simulation analyses**

226

227 2.3.1: Schematic cycle generation

228

229 To illustrate the relationship between waveform shape, instantaneous phase and frequency, a  
230 set of noise free oscillations were generated. First, a linearly progressing phase time-course is  
231 generated and sinusoid is created by taking a sine-transform of this wrapped phase. Different  
232 non-sinusoidal cycles are generated by modulating the unwrapped phase time-course by sine  
233 and cosine waves at different phases and frequencies. The cycles with extrema and edge  
234 asymmetry are generated by modulating the phase with a 1 Hz sine or cosine respectively.

235 The extrema curvature examples are generated by modulating the linear phase with a 2 Hz  
236 sinusoid. From the computed cycle time-courses the instantaneous phase and instantaneous  
237 frequency are re-estimated using the Hilbert transform. Finally, the waveform shape is  
238 represented by phase-aligning the instantaneous frequency time-course of each cycle type  
239 with its instantaneous phase.

240

241 2.3.2: Noisy Signal Generation

242

243 A more realistic noisy simulation was used for the results in figures 3, 4 and 5. A simulated  
244 oscillation at 12 Hz was generated using an autoregressive oscillator with the following  
245 transfer function:

246

$$247 \quad H(f) = \frac{1}{1 - 2r \cos \theta + r^2}$$

248

249 Where  $\theta$  is the angular frequency of the oscillator (in rads/sec) and  $r$  is the magnitude of the  
250 roots of the polynomial ( $0 < r < 1$ ). For this simulation, we computed  $H$  for  $r=0.95$  and  $\theta$   
251 equivalent to 12 Hz and used its parameters to filter (a forwards and backwards filter using  
252 `scipy.signal.filtfilt`) white noise. This generates a noisy sinusoidal oscillation which contains  
253 random dynamics in the frequency and amplitude of each oscillatory cycle. Sixty seconds of  
254 data were generated at 512 Hz.

255

256 This simulated oscillation was then modulated by one of two equations defined in equations  
257 50.24 and 50.25 in section 50-6 in Volume 1 of Feynman's Lectures of Physics (Feynman et  
258 al., 2011). The first equation defines a linear system that scales the signal by a constant  
259 leaving the waveform shape unchanged.

260

$$261 \quad x_{out} = Kx_{in} + e(t)$$

262

263 Whilst the second equation defines a nonlinear system that includes a term inducing a change  
264 in waveform shape as well as scaling the signal.

265

$$266 \quad x_{out} = K[x_{in} + \epsilon x_{in}^2] + e(t)$$

267

268 The nonlinearity in the second equation makes the peak of the oscillations shorter and widens  
269 the trough. Both systems include an additive white noise term.

270

271 2.3.3: Noisy Signal Analysis

272

273 The simulations are separated into IMFs using the masked sift. The relatively straightforward  
274 dynamics in this simulation allow a simplified mask-sift to be applied. To define the mask  
275 frequencies, a first IMF is extracted using the standard sift routine. The number of zero-  
276 crossings in this IMF defines the frequency of the initial mask with subsequent masks being



277 applied at half the frequency of the previous one. The mask amplitudes are set equivalent to  
278 1-standard deviation of the previously extracted IMF.

279

280 The 12-Hz oscillation is isolated in the third IMF (IMF-3) of this mask sift. The frequency  
281 transformation of this IMF is computed using the Hilbert transform (section 2.2.1). The  
282 Hilbert-Huang transform (HHT) is computed using 64 frequency bins between 2 and 35 Hz.  
283 A wavelet transform was computed using a 5-cycle Morlet basis computed using the same 64  
284 frequencies as the HHT.

285

286 The timing of individual oscillatory cycles is identified using the phase jumps in the  
287 instantaneous phase time course where the oscillatory amplitude was above a threshold of  
288 0.04 and instantaneous frequency below 18Hz. We compute control-point ratios (section  
289 2.2.3), time locked instantaneous frequency profile and phase aligned instantaneous  
290 frequency profile (section 2.2.4) across all included cycles (see section 2.2.2) of IMF-3.

291

292 The sift, frequency transform, cycle detection and shape metrics are computed for both the  
293 linear and non-linear systems defined in section 2.3.2 The difference between the linear and  
294 non-linear systems is quantified using a separate t-test on the peak-to-trough and ascending-  
295 to-descending control point ratios, and for each point in phase across the phase-aligned  
296 instantaneous frequency profiles. Finally, the normalised waveforms are computed from the  
297 average phase-aligned instantaneous frequency profiles from each system.

298

## 299 **2.4: Hippocampal theta analyses**

300

301 Local field potentials (LFPs) were recorded from the pyramidal layer of hippocampal CA1  
302 using multi-channel tetrodes (Lopes-dos-Santos et al., 2018). Recordings were made during  
303 open-field exploration in both familiar and novel environments across six recordings taken  
304 over three recording days from each of three mice. Further data acquisition details can be  
305 found in appendix 1.

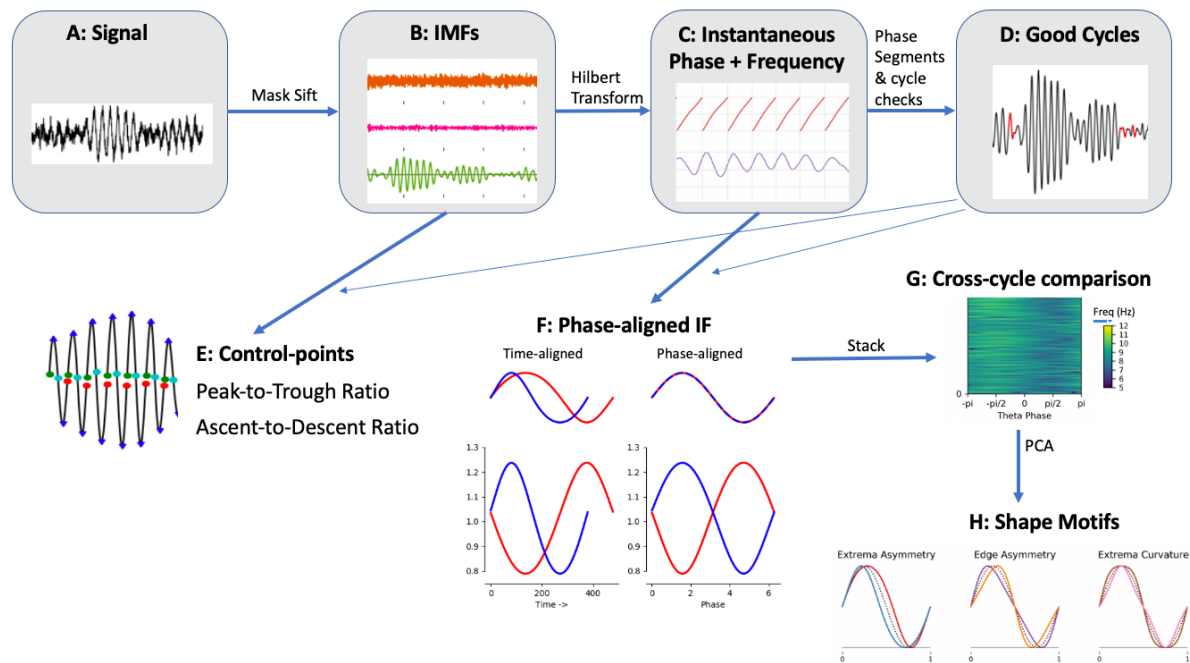

306

307 **Figure 1: Overview of analysis applied to LFP recordings of hippocampal theta.**

308 A: The raw input LFP recording.

309 B: The raw signal is split into Intrinsic Mode Functions (IMFs) using a mask sift.

310 C: An instantaneous phase and instantaneous frequency time-course is estimated from the  
311 theta IMF using the Hilbert Transform.

312 D: Cycle start and stop times are identified from jumps in the wrapped phase time-course and  
313 'bad' cycles with distortions of reversals in phase are identified and removed.

314 E: Control points (peaks, troughs, ascending zero crossings and descending zero crossings)  
315 are estimated from the good cycles within the theta IMF. Shape is then summarised using  
316 peak-to-trough and ascending-to-descending duration ratios.

317 F: The instantaneous frequency of each good cycle is phase aligned to correct for variability  
318 in cycle duration and internal cycle timings.

319 G: The phase-aligned cycles are stacked into a single array to allow for straightforward  
320 comparisons between cycles.

321 H: A set of shape motifs are identified from the phase aligned IF using PCA.

322 2.4.1: Mask sift and Frequency transform.

323

324 LFP recordings were each separated into oscillatory components using the mask sift (Figure 1  
325 A & B) with masks placed at  $f_m = [350, 200, 70, 40, 30, 7, 1 \text{ Hz}]$ . These masks were  
326 selected to capture components with frequencies above the mask frequency down to around  
327  $f_m * 0.7$  (Fosso and Molinas, 2017; Rilling and Flandrin, 2008). Keeping the masks constant  
328 across recordings ensures that the frequency content of each IMF will be comparable across  
329 recordings. For instance, we isolate the theta oscillation in IMF-6 using a mask frequency of  
330 7 Hz. These mask frequency parameters were validated by rerunning the phase-aligned  
331 instantaneous frequency analyses with jittered mask-frequencies (Supplemental section 8.2;  
332 figure S2), showing that the theta waveform description is robust to reasonable changes to the  
333 mask frequency values. These mask frequencies were effective in this set of CA1 LFP  
334 recordings, but it is expected that a different set of mask frequencies would be needed to  
335 analyse time-series containing different oscillatory dynamics. Next, a frequency  
336 transformation was computed for each IMF using the Hilbert transform and the methods from  
337 section 2.2.1 (Figure 1C).

338

339 2.4.2: Cycle detection

340

341 To ensure that the detected theta cycles are physiologically interpretable theta activity, we  
342 identified cycles in each recording during times where the speed of movement of the mouse  
343 was greater than 1 cm/second. As faster movement is associated with stronger theta  
344 oscillations, this restriction increases the probability that our detected cycles represent  
345 physiologically interpretable theta events. We additionally restricted analyses to cycles in  
346 IMF-6 where cycle duration corresponded to 4-11 Hz frequency range (i.e., 312 and 113  
347 samples respectively) and cycle amplitude was above the bottom 10% of the amplitude  
348 distribution. Finally, cycles that failed the cycle inclusion checks outlined in section 2.2.2  
349 were removed from analysis at this point (Figure 1D).

350

351 2.4.3: Cycle comparisons

352

353 We computed the temporally aligned instantaneous frequency profile, phase-aligned  
354 instantaneous frequency profile and normalised waveform for each included theta cycle. The  
355 average waveform shape within each dataset was estimated from the averaged phase aligned  
356 instantaneous frequency and a group average constructed from the mean of the six individual  
357 runs. Variability in waveform shape across single cycles in the group data is summarised  
358 using the instantaneous frequency mean vector (section 2.2.5) and visualised as a distribution  
359 in the complex plane in which the x-axis represents asymmetry between ascending and  
360 descending edge frequency and the y-axis represents asymmetry between peak and trough  
361 frequency. For comparison, we also identified the control points from each cycle of the theta  
362 IMF and constructed the peak-to-trough and ascending-to-descending duration ratios (Cole  
363 and Voytek, 2019).

364

365 2.4.4: Waveform Motifs and Relation to behaviour

366

367 We next look to explore the waveform shapes which are present in the phase-aligned  
368 instantaneous frequency values. We use PCA (section 2.2.6) to identify the data-driven set of  
369 shape components that explain the most variance in the shape of theta cycles in this dataset.  
370 The first four principal components explaining 95% of variance defined our four shape motifs  
371 and were retained for further analysis. The reproducibility of the PCA is validated across 500  
372 split-half iterations assessing the proportion of variance explained by each PC and the  
373 correspondence between the component shape in the two halves (Supplemental section 8.3;  
374 figure S3).

375

376 The relationship between the shape motifs and a set of three cycle covariates (i.e., cycle  
377 amplitude, cycle duration and mouse movement speed) was quantified using a General Linear  
378 Model (GLM). The GLM was created with a design matrix containing the mean and the three  
379 z-transformed covariates. These predictors were used to model the between cycle variability  
380 in the principal component (PC) scores for each shape component in turn. This resulted in  
381 four GLMs each fitting four parameter estimates. The t-statistic of each parameter estimate  
382 was computed, and statistical significance established using a row-shuffle non-parametric  
383 permutation scheme. 5000 permutations were computed for each PC-motif and dependent  
384 variable before statistical significance determined at  $p < 0.01$ .

## 385 **3: Results**

386

### 387 **3.1: Instantaneous Frequency tracks waveform shape**

388

389 Figure 2 illustrates how instantaneous frequency reflects waveform shape in a set of noiseless  
390 simulated cycles (see section 2.3.1). A sinusoidal cycle (Figure 2A) has a monotonically  
391 progressing phase time-course which, in turn, has a flat instantaneous frequency profile.  
392 Analysis of the duration of different segments reveals that the peak, trough, ascending edge  
393 and descending edge all have the same duration. Cycles with a narrow peak, trough or  
394 descending edge show corresponding changes in their instantaneous frequency (Figure 2 B &  
395 C). Specifically, the longer duration, slower features correspond to a lower instantaneous  
396 frequency. These instantaneous frequency profiles can describe a wide range of possible  
397 shapes. For example, cycles in which both the peak and trough are widened or pinched lead  
398 to instantaneous frequency profiles with multiple extrema (Figure 2: last column). While the  
399 simple control-point metrics used here can track individual waveform features such as peak  
400 or trough duration (Figure 2: bottom row), the quantification of more complex shapes would  
401 require the definition of additional control points and shape metrics.

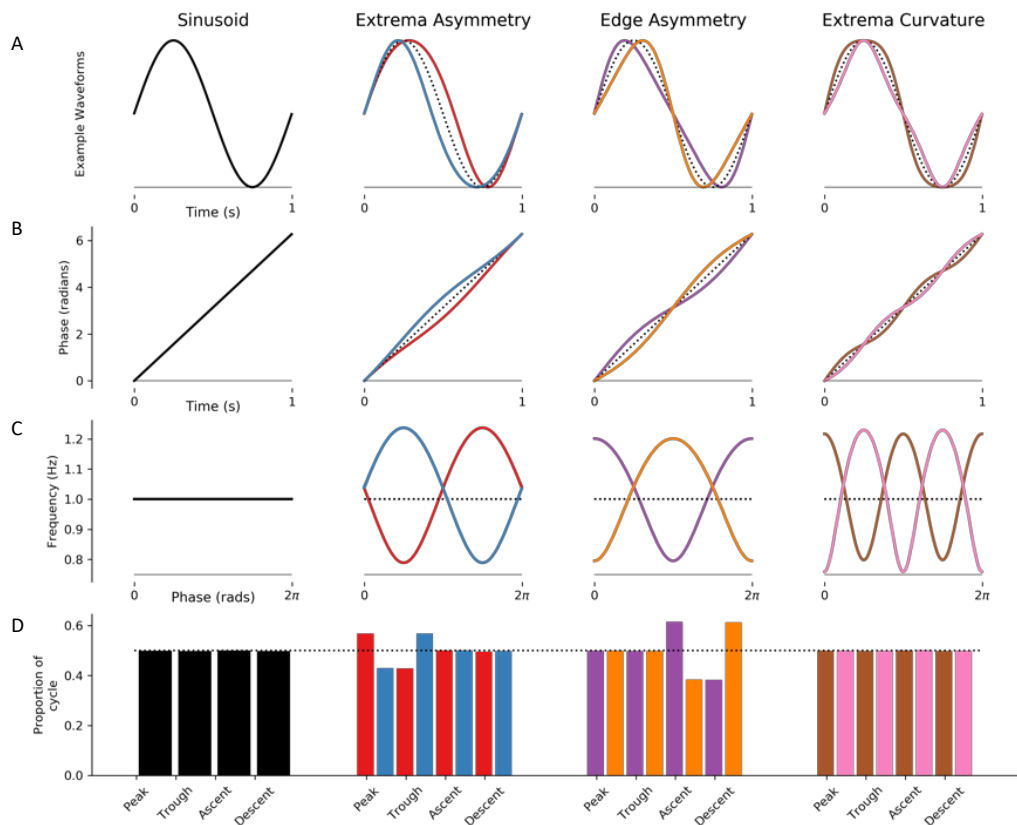

402

403 **Figure 2: Instantaneous Frequency changes with oscillatory waveform shape.**

404 The four columns illustrate examples of different simulated oscillatory cycles with distinct  
405 waveform shapes.

406 A: The time-domain waveforms for each cycle. The first column shows a sinusoid, and the  
407 remaining three columns show pairs of cycles with opposite waveform distortions (for  
408 reference a sinusoid is shown as a dotted back line).

409 B: The instantaneous phase time course of the signals in the corresponding column.

410 C: The instantaneous frequency time course of the signals in the corresponding column.

411 D: The durations between different control points for each cycle the dotted line indicates the  
412 expected duration for a sinusoid.



### 413 **3.2: Quantifying and comparing waveform shape in a simulated signal**

414

415 We next use simulations to illustrate how instantaneous frequency analyses can be conducted  
416 on a noisy signal with a dynamic 12 Hz oscillation modified by a non-linearity which widens  
417 the trough of each cycle (see section 2.3.2). This oscillation was isolated from the noisy  
418 background using mask sift (Figure 3B) before the Hilbert transform was used to compute the  
419 instantaneous phase time-course (Figure 3C). It is evident that the phase time-courses do not  
420 progress linearly through all cycles; these deviations from monotonic phase progression are  
421 quantified in the instantaneous frequency time-course (Figure 3D). Instantaneous frequency  
422 sweeps within a single cycle reflect the non-sinusoidal shapes of the time-domain waveforms.  
423 For this simulation, the instantaneous frequency tends to be higher during the first half of the  
424 cycle and lower in the second half, reflecting the non-linearity that shortens the peak and  
425 widens the trough of these oscillations.

426

427 The HHT of the simulated signal (Figure 3E) retains the high time-frequency resolution of  
428 the instantaneous frequency time-course allowing within cycle frequency dynamics to be  
429 visible. In contrast, while a standard 5-cycle Morlet wavelet transform identifies similar  
430 power dynamics, variability in frequency within single cycles are not resolved (Figure 3F). A  
431 further disadvantage is that the non-sinusoidal waveform shape of this simulation introduces  
432 a 24Hz harmonic component into the wavelet transform.

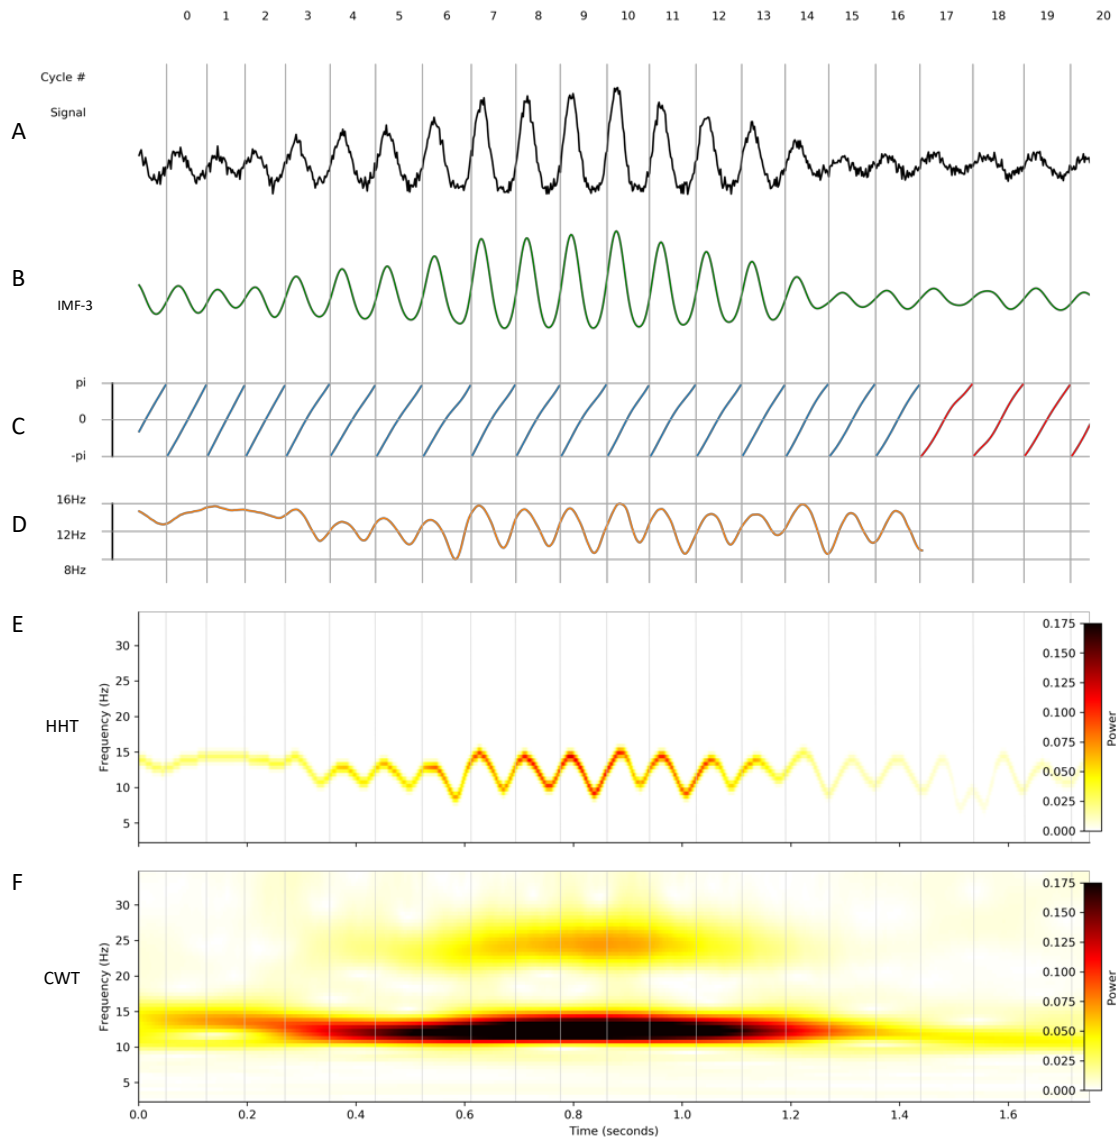

433

434 **Figure 3: Instantaneous frequency analysis on a noisy non-sinusoidal oscillation.**

435

436 A simulated 12 Hz oscillation can be extracted from a noisy time-series and represented with  
437 EMD, instantaneous frequency and the Hilbert-Huang Transform. Vertical grey lines denote  
438 the starting times of individual cycles across the different panels.

439 A: The simulated noisy non-sinusoidal oscillation.

440 B: IMF-3 extracted from 'A' containing the simulated oscillation.

441 C: Instantaneous phase time-course of IMF-3. Cycles excluded from further analysis are  
442 indicated in red. In this case, these cycles were below the amplitude threshold.

443 D: Instantaneous frequency time-course of IMF-3.

444 E: Hilbert-Huang Transform (HHT) of the simulated data segment.

445 F: Continuous Wavelet Transform (CWT) of the simulated data segment.

446 Individual cycles of an oscillation play out at different rates leading to differences in the  
447 timing of extrema within cycles and in overall cycle duration. These two sources of  
448 variability hamper comparisons between individual oscillatory cycles. As outlined above  
449 (section 2.2.3) one method to solve this issue is to discretise the cycle using a set of control  
450 points before computing the proportion of time spent in different segments of the cycle  
451 (Belluscio et al., 2012; Cole and Voytek, 2019). The cycle phase quartiles (ascending zero-  
452 crossing, peak, descending zero-crossing and trough) of 500 cycles of the simulated signal is  
453 shown in Figure 4A. The ratios of peak-to-trough duration and ascending-to-descending time  
454 of these cycles suggests longer troughs and shorter peaks, whilst the ascending and  
455 descending portions of the cycle are approximately equal in duration (Figure 4B).

456  
457 An alternative approach for comparing cycles is to align the instantaneous frequency profiles  
458 to one of the control points. For example, we aligned the 500 cycles to the ascending zero-  
459 crossing and computed their time-locked average (Figure 4C). The time-locked instantaneous  
460 frequency profile of these cycles is not flat, reflecting the presence of non-sinusoidal shape in  
461 this simulated signal. However, the precise type of non-sinusoidal shape is ambiguous from  
462 this average, due to variability in the location of different waveform features within single  
463 cycles. In this case, the instantaneous frequency is highest around 10 samples after the  
464 ascending zero-crossing; however, this time-lag might correspond to different points in the  
465 waveform in different cycles. In addition, variability in the duration of cycles means that,  
466 after a certain point, different numbers of cycles contribute to the average, making the  
467 estimate unstable.

468  
469 Here we present an approach that overcomes these shortcomings. In brief, phase-alignment  
470 removes this ambiguity by visualising the instantaneous frequency of a cycle across a fixed  
471 grid of points along its phase (see section 2.2.3). For instance, an oscillatory peak is  
472 normalised to occur at the same phase value irrespective of the cycle's duration or shape.  
473 This corresponds always to exactly one quarter of the phase of each cycle, but not necessarily  
474 to one quarter of the duration of each cycle. By aligning the instantaneous frequency to the  
475 phase, we remove the temporal distortions caused by varying shapes and cycle durations, and  
476 express the shape with the phase-aligned instantaneous frequency values. The phase-aligned  
477 instantaneous frequency of the simulated cycles (Figure 4D) now unambiguously shows the  
478 increased frequency around the peak of the 12Hz oscillation and decreased frequency around  
479 the trough. The average across the phase-aligned cycles is then a smooth representation of the  
480 shape of the entire cycle.

481

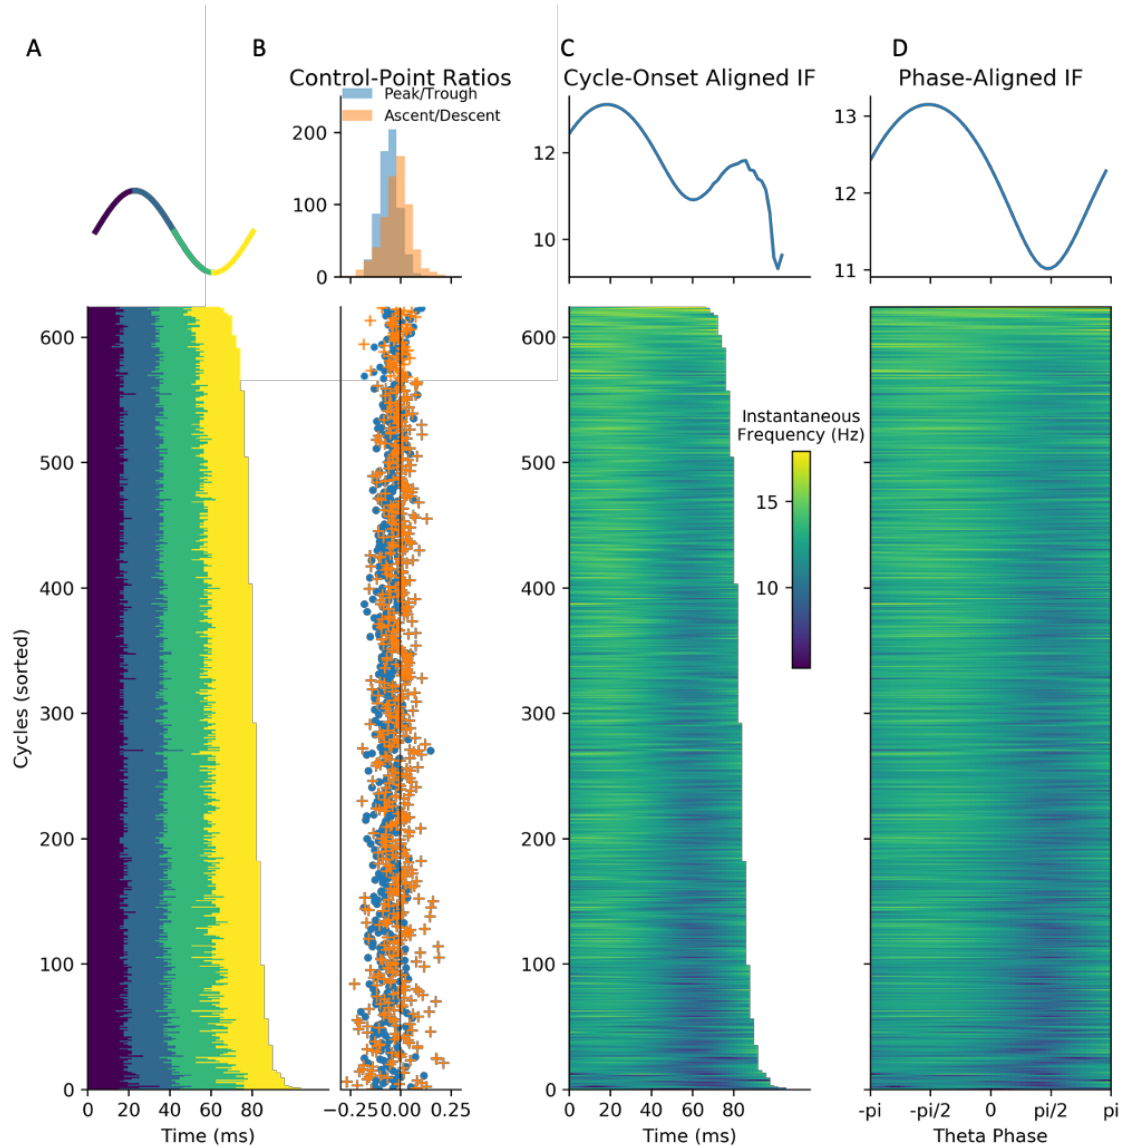

482

483 **Figure 4: Methods for comparing waveform across cycles.**

484 Simulated data illustrating how waveform shape can be quantified using control point ratios,  
485 instantaneous frequency and phase-alignment.

486 A : The durations between successive control points for each simulated cycle.

487 B : Top: distributions of peak-to-trough and ascent-to-descent durations. Bottom: The peak-  
488 to-trough and ascent-to-descent ratios for each cycle.

489 C : Top: the average temporally aligned instantaneous frequency profiles. Bottom the  
490 temporally aligned instantaneous frequency profile for each cycle.

491 D : Top: the average phase-aligned instantaneous frequency profiles. Bottom: the phase-  
492 aligned instantaneous frequency profile for each cycle.

493 Comparisons between sets of cycles is straightforward once waveform shape has been  
494 estimated from instantaneous frequency and normalised through phase-alignment. This is  
495 illustrated by contrasting the shape of a noisy a 12-Hz oscillation modulated by either a linear  
496 or non-linear system (section 2.3.2; Figure 5A). The non-linear system has a wide-trough  
497 shape whilst the linear system has a sinusoidal waveform (Figure 5B & C). The average  
498 phase-aligned instantaneous frequency values for the linear system correspond to a flat line at  
499 12 Hz throughout the cycle. In contrast the non-linear system has an increased instantaneous  
500 frequency in the first half of the cycle and a decreased frequency in the second half (Figure  
501 5D). We can compare the average instantaneous frequency profiles from both systems  
502 (Figure 5E) and compute conventional t-statistics (Figure 5F) to quantify any differences in  
503 waveform shape. In this simulation, we find that the non-linear system creates oscillations  
504 with increased frequency peaks and decreased frequency troughs.

505

506 Finally, the phase-aligned average frequency profiles can be projected back into a  
507 ‘normalised waveform’ to more intuitively visualise the type of non-sinusoidal distortions.  
508 These normalised waveforms have a constant duration and an amplitude of one, but retain  
509 any distortions in waveform shape quantified in the instantaneous frequency profile. For this  
510 simulation, the normalised waveform reveals the pinched peak and the widened generated by  
511 the non-linear system (Figure 5G).

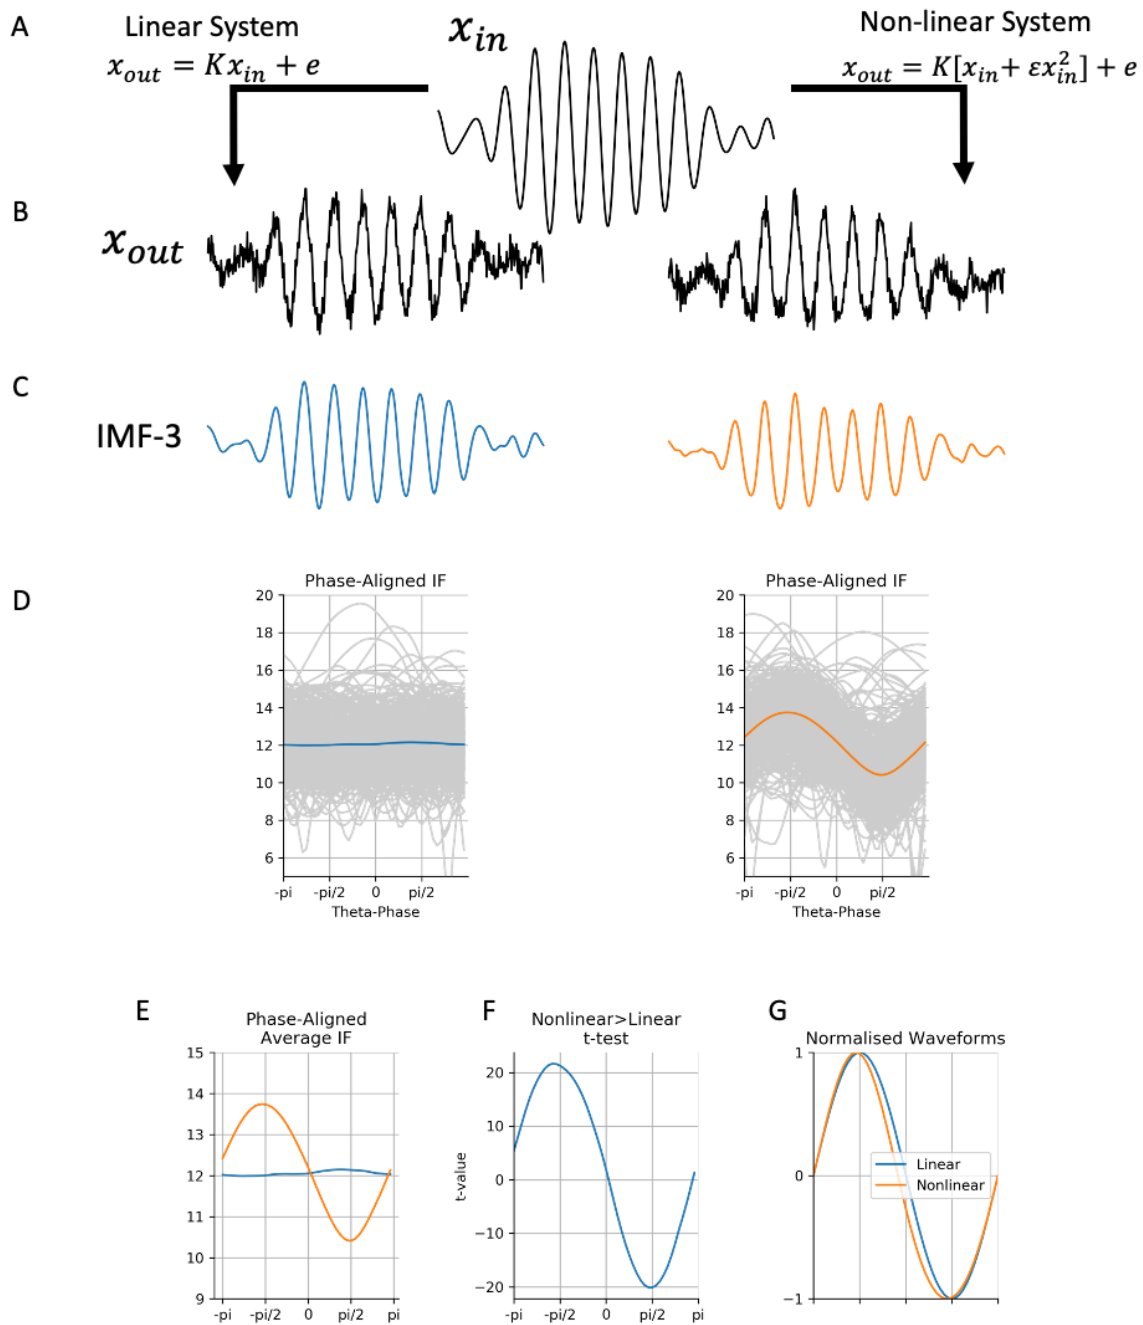

512

513 **Figure 5: Comparing waveform shape in two simulated examples.**

514 A : A simulated oscillation is modulated by either a linear or a non-linear system.

515 B : Output oscillations of the two systems.

516 C : Oscillations recovered from the noisy simulation using EMD.

517 D : Average phase-aligned instantaneous frequency profiles for the two systems with  
518 individual cycles in grey.

519 E : Average instantaneous frequency profiles from ‘D’ overlaid together.

520 F : t-values for a contrast between the instantaneous frequency in the two systems for each  
521 point in phase.

522 G: Normalised waveforms for the two average frequency profiles in ‘E’.



### 523 **3.3: Characterising waveform shape in Hippocampal Theta**

524

525 LFP data recorded from the mouse hippocampus were analysed to explore the utility of  
526 phase-aligned instantaneous frequency as a measure of waveform shape. Figure 6A shows a  
527 three-second LFP recording from the pyramidal layer of the mouse dorsal CA1 (black)  
528 overlaid with the EMD-extracted theta IMF (red, Figure 6B shows all IMFs). In this case, the  
529 theta oscillation was isolated into IMF 6 with minimal disruption to its amplitude or  
530 waveform shape dynamics. Many of the theta cycles within this window have prominent non-  
531 sinusoidal waveform shapes, which are qualitatively visible in both the raw data trace  
532 (Buzsáki et al., 1986, 1985) and the EMD-extracted theta IMF. Importantly, the oscillatory  
533 waveform shape varies between successive cycles, though the amplitude and duration of the  
534 theta cycles are relatively consistent.

535

536 The instantaneous phase (Figure 6C) and instantaneous frequency (Figure 6D) were  
537 computed from the theta oscillation in IMF-6. As with the simulation analysis, any within-  
538 cycle dynamics in the instantaneous frequency naturally represent the waveform of each  
539 cycle. This was summarised with the standard deviation of instantaneous frequency values  
540 within each cycle (Figure 6E). As an illustration, cycles 5, 9 and 11 have relatively sinusoidal  
541 shapes with flat instantaneous frequency profiles and low frequency variability. In contrast,  
542 cycle 13 is relatively non-sinusoidal with a dynamic instantaneous frequency profile and high  
543 frequency variability. The HHT provides a time-frequency description with sufficient  
544 resolution to depict these within cycle instantaneous frequency sweeps (Figure 6F). In  
545 contrast, a 5-cycle wavelet transform of the same data was not able to resolve these dynamics  
546 (Figure 6G).

547

548 Looking at individual cycles illustrates how instantaneous frequency can characterise  
549 waveform shape (Figure 7). Frequency increases and decreases correspond to slowing down  
550 and speeding up of the cycle as its waveform shows non-sinusoidal behaviour. It is evident  
551 that there are many observed shape profiles. For instance, the cycles labelled as *i* and *iii* in  
552 figure 7 had frequencies that dip during the centre of the cycle, indicating an elongated, low  
553 frequency descending edge. Cycle *v* had slowest frequency around  $-\pi/2$  corresponding to a  
554 wide peak. In contrast, cycle *vi* had relatively high frequency around  $-\pi/2$  and lower  
555 frequency at  $+\pi/2$  leading to a short, pinched peak and an elongated trough. Overall, the  
556 phase-aligned instantaneous frequency profiles and normalised waveforms provide a rich  
557 description of oscillatory waveform, despite wide variability in cycle amplitude, duration and  
558 shape.

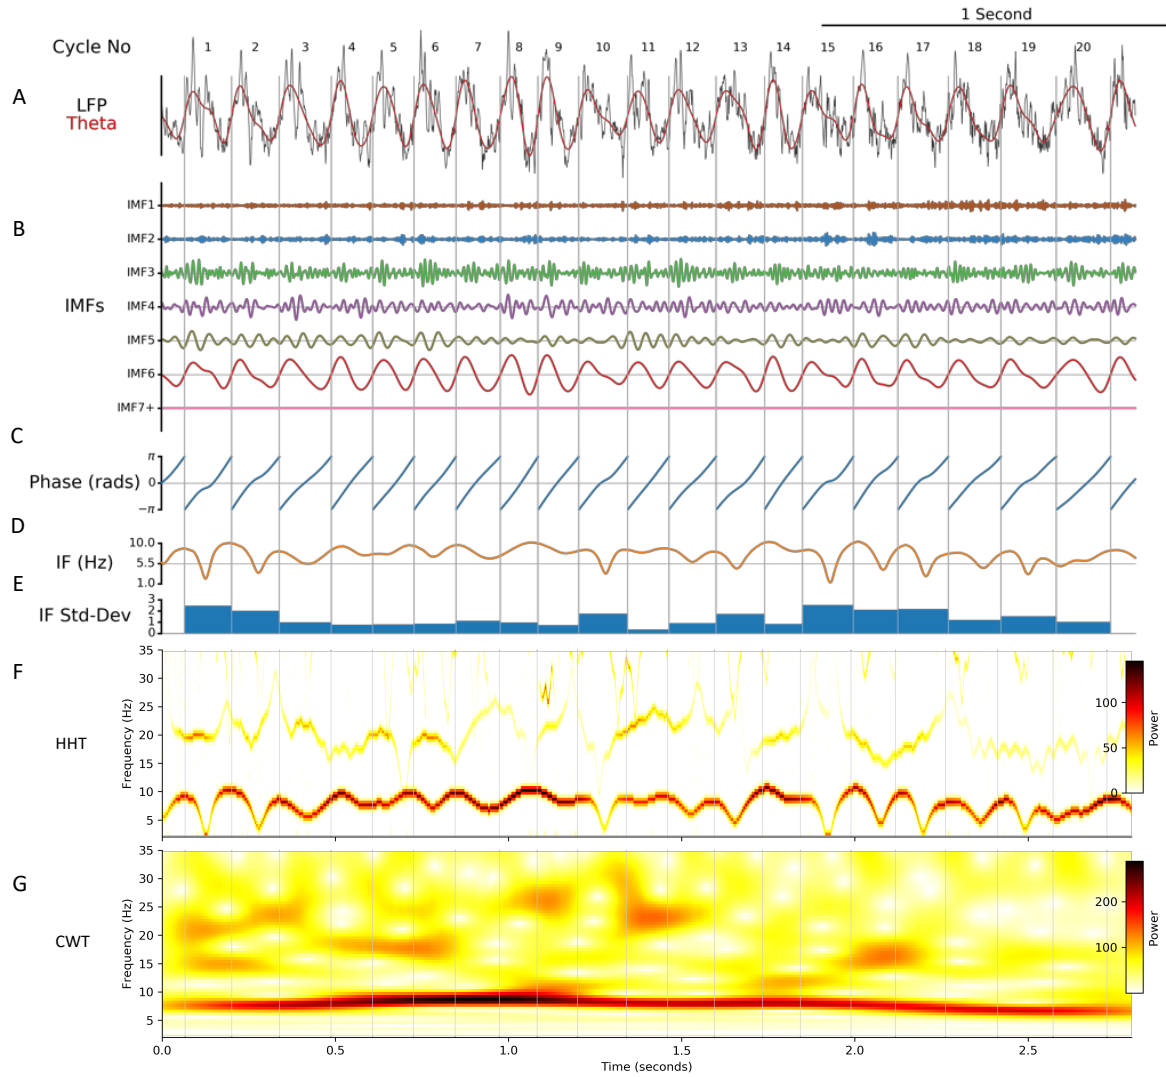

559

560 **Figure 6: EMD analysis of a LFP segment containing hippocampal theta oscillations.**

561 A : A segment of a hippocampal LFP recording (black) overlaid with the extracted theta  
562 oscillation (red).

563 B : IMFs extracted from this data segment using the mask-EMD. The theta oscillation is  
564 isolated into the IMF-6.

565 C : Instantaneous phase time-course of the theta IMF.

566 D : Instantaneous frequency time-course of the theta IMF.

567 E : Variability in instantaneous frequency for each theta cycle.

568 F : Hilbert-Huang Transform (HHT) of the LFP segment.

569 G : Continuous Wavelet Transform (CWT) of the LFP segment.

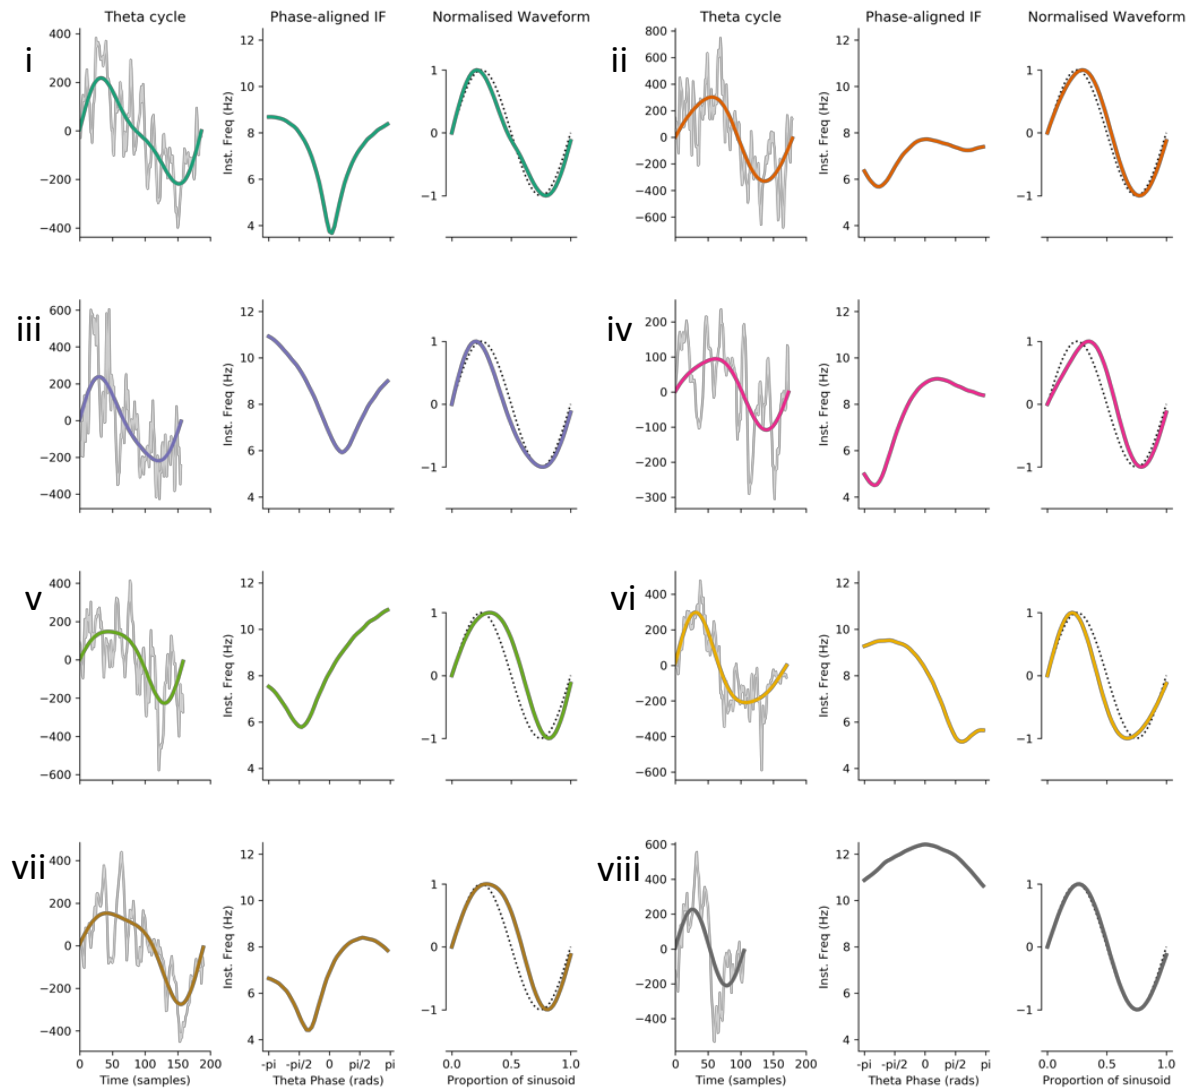

570

571 **Figure 7: Characterising shape in eight example cycles of hippocampal theta.**

572

573 Eight representative theta cycles. For each example, the first subpanel shows the raw data  
574 (grey) with the theta IMF super imposed (coloured line). The second subpanel shows the  
575 phase aligned instantaneous frequency and third panel shows the normalised waveform  
576 (coloured line) with a sinusoid for reference (black dotted line).

### 577 **3.4: Using phase-aligned instantaneous frequency to compare cycles.**

578

579 We next computed waveform shape from around 1500 hippocampal theta cycles from a  
580 single recording using three different methods: control-point ratios (see section 2.2.6),  
581 control-point locking, and phase-alignment (see section 2.2.3). The durations between  
582 specified control points were computed for each cycle (Figure 8A) and the peak-to-trough  
583 ratio and the ascent-to-descent ratio computed (Figure 8B). The peak-to-trough ratios are  
584 evenly distributed around zero, whereas there is a bias in the ascent-to-descent ratios  
585 suggesting that the descending edge of theta is longer than the ascending edge. The  
586 instantaneous frequency profiles locked to the ascending zero-crossing show a wide variety  
587 of shapes with a group average tendency for frequency to start around 9 Hz and to decrease  
588 through the duration of the cycle (Figure 8C). As described above, this average effect is  
589 challenging to interpret due to within-cycle variability in the timing of cycle features and  
590 between cycle variability in total cycle duration. Our proposed phase-aligned instantaneous  
591 frequency profiles (Figure 8D) resolve these ambiguities. This shows that theta cycle  
592 instantaneous frequency in this single recording starts around 9 Hz at the ascending zero-  
593 crossing, decreasing to around 8.1 Hz at the descending zero-crossing, before increasing  
594 again to 9 Hz at the end of the cycle. This is consistent with a fast-ascending and slow  
595 descending cycle shape revealed by the control point analysis and in previous literature. The  
596 phase-aligned instantaneous frequency approach is able to show this effect as a continuous  
597 shape profile for single cycles, which can be straightforwardly compared at the group level.

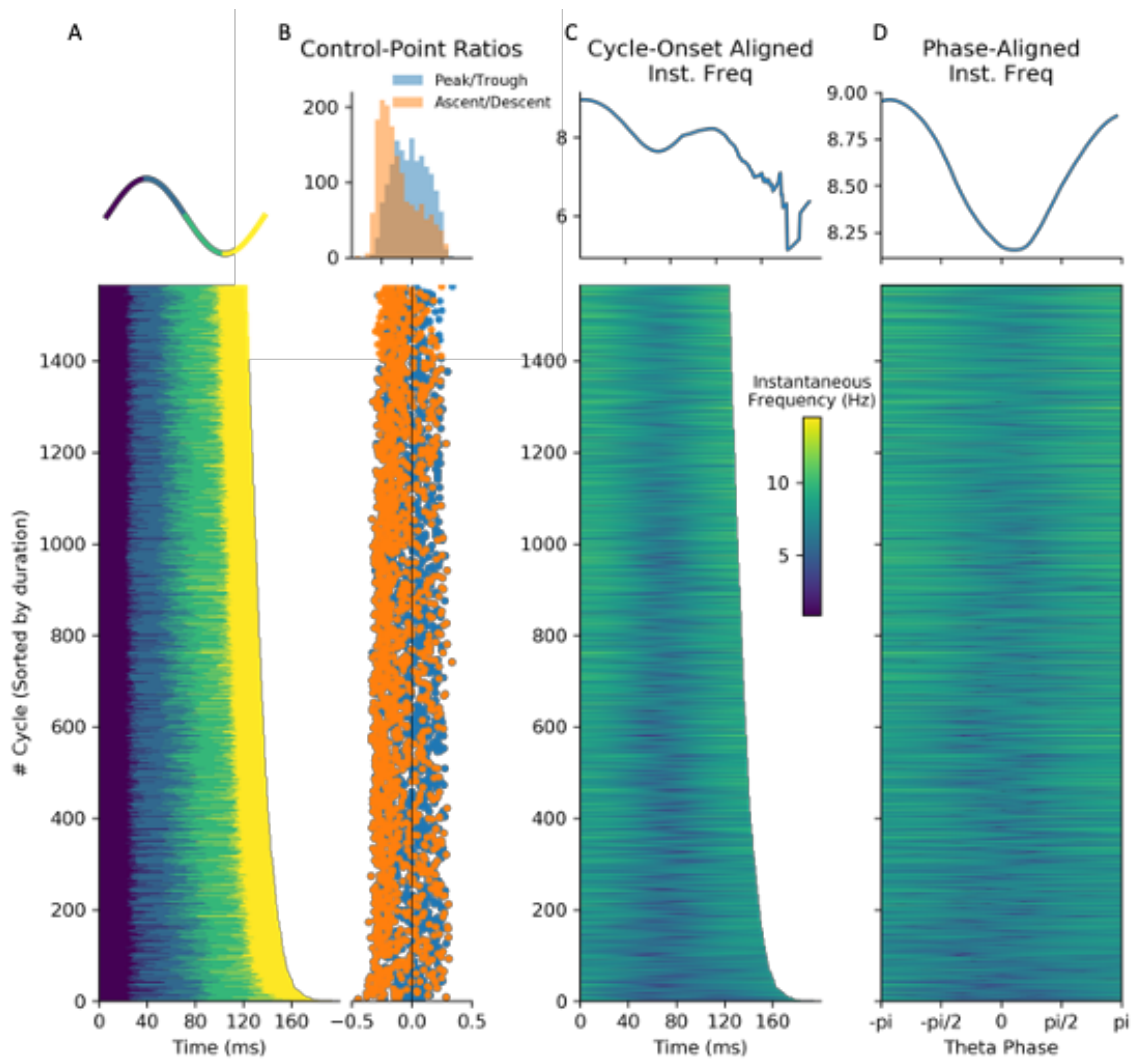

598

599 **Figure 8: Methods for quantifying waveform in hippocampal theta.**

600 A : Durations between successive control points for each simulated cycle.

601 B : Top: Distributions of peak-to-trough and ascent-to-descent durations. Bottom: Peak-to-

602 trough and ascent-to-descent ratios for each cycle.

603 C : Top: Average of temporally aligned instantaneous frequency profiles. Bottom:

604 Temporally aligned instantaneous frequency profile for each cycle.

605 D : Top: Average of phase-aligned instantaneous frequency profiles. Bottom: Phase-aligned

606 instantaneous frequency profile for each cycle.

### 607 **3.5: Theta has a stereotyped asymmetric shape with wide variability over cycles**

608

609 We next summarised the average waveform across theta cycles from six recordings taken  
610 from three mice. The average phase-aligned instantaneous-frequency profile is computed for  
611 each recording and for the whole dataset. The overall group-level average waveform had a  
612 cosine-type profile centred around an average instantaneous frequency of ~8.6 Hz (Figure  
613 9A, average in black and individual recording sessions in grey). On average, the  
614 instantaneous frequency peaked within the cycle around 9 Hz at the ascending zero-crossing  
615 and drops to just below 8.4 Hz between the peak and descending zero-crossing. These results  
616 are consistent with previous studies showing an asymmetry between the fast-rising and slow-  
617 decaying halves of a theta cycle (Belluscio et al., 2012; Buzsáki et al., 1986; Cole and  
618 Voytek, 2019). All six recordings across three animals showed a shape with a maximum  
619 frequency around the ascending zero-crossing and a minimum on the descending edge,  
620 though there was some variability in whether the lowest frequency was closer to the peak or  
621 trough.

622

623 To visualise the variability in waveform shape across cycles and recording sessions, we  
624 performed a complementary analysis using the instantaneous frequency mean-vector to see  
625 the distribution of single-cycle waveforms across a simplified 2-dimensional shape-space  
626 (Figure 9B; section 2.2.4). The distribution had a non-zero mean on the x-axis for all  
627 recordings, indicating that the highest frequencies in a cycle are typically at the ascending  
628 edge, consistent with the average in Figure 9A and with previous literature on the theta cycle  
629 (Belluscio et al., 2012). Though the overall mean shift in the distribution of cycles is robust,  
630 there is substantial cycle-to-cycle variability indicated by the width of the distribution.



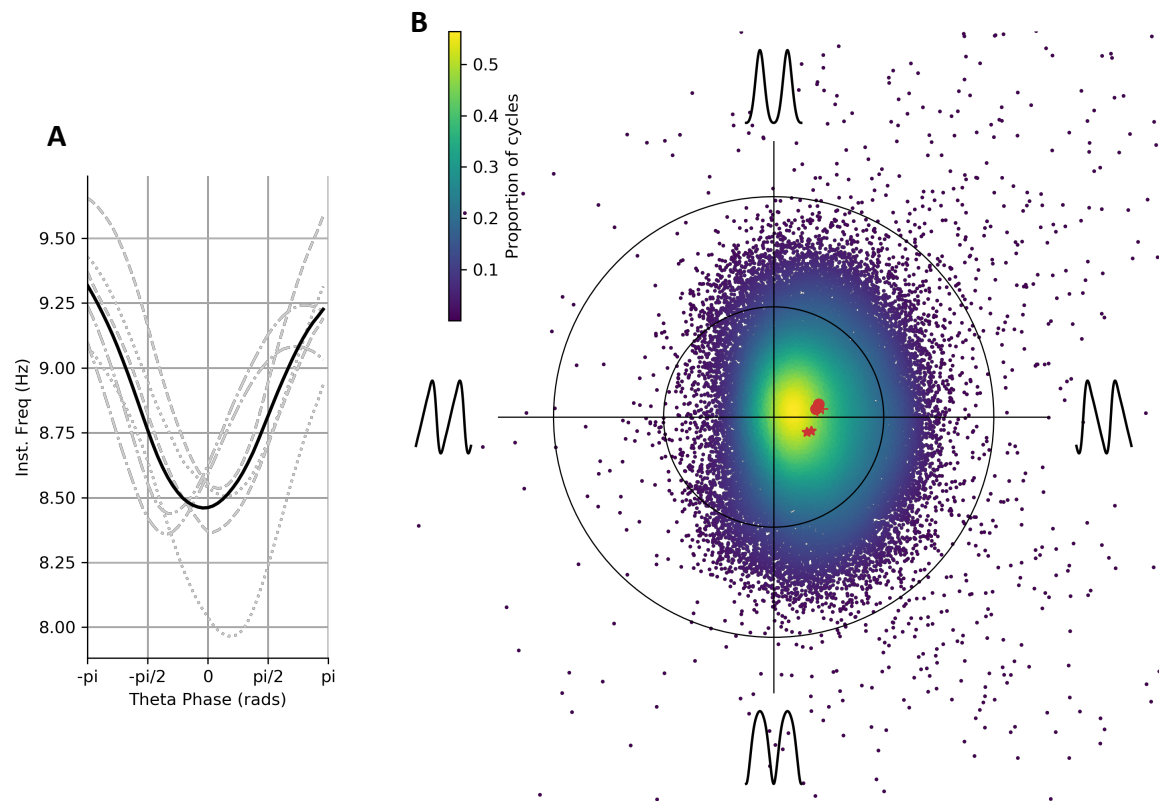

631

632 **Figure 9: Average waveform shape and variability in shape across cycles in**  
633 **hippocampal theta.**

634 A : Average of phase-aligned instantaneous frequency profiles for each of the six separate  
635 recording sessions across three mice. The different dashed line styles indicate the runs from  
636 the different mice and the solid black line represents the average across all six recordings.

637 B : Each individual cycle is projected into a simplified 'shape-space' to visualise the overall  
638 variability in waveform shape around the average. Individual recording averages are shown  
639 in red with different symbols representing the three animals.

640 **3.6: Distinct waveform motifs are differentially related to behavioural and**  
641 **electrophysiological states.**

642

643 To further describe the variability in waveform shape across cycles and characterise its  
644 relation to movement speed, theta amplitude and theta cycle duration we identify a set of  
645 waveform shape ‘motifs’ using PCA. The PC values define a set of shape motifs that are each  
646 expressed to different degrees in the observed cycles (see section 2.2.5 and 2.4.4). The first  
647 four components describing 96% of variance are retained for further analysis (Figure 10).  
648 The waveform shape represented by each PC motif is summarised by the normalised  
649 waveforms (Figure 10A). These normalised waveforms are computed from the instantaneous  
650 frequency profiles of the PC component-vectors (Figure 10B) projected onto the extreme  
651 ends of the PC score distribution (Figure 10C). The shape of each individual cycle can then  
652 be described by a set of four PC scores, relating to the amount of each component which it  
653 contains.

654

655 PC-1 (63.31% of variance) describes a continuum of shape from a sharp peak and wide  
656 trough through to a wide peak and sharp trough. This shape is similar to the y-axis in the  
657 mean vector distribution in Figure 9B. In contrast, PC-2 (22.56% of variance) describes  
658 shapes ranging between an elongated ascending edge and an elongated descending edge,  
659 similar to the x-axis of Figure 9B. The remaining components describe more complex shapes  
660 with relatively small contributions to the variance explained. PC-3 (6.86% of variance)  
661 captures shapes with a left or right ‘tilt’ around their extrema and PC-4 (3.33% of variance)  
662 describes shapes with a sharper or flatter curvature around the extrema.

663

664 The control-point-based ascending-to-descending ratio and peak-to-trough ratio are computed  
665 for each cycle. For each PC, these values are partitioned into cycles with positive or negative  
666 PC scores (relating to distinct ends of the shape continuum for that component) and their  
667 distributions plotted in Figure 10D. The peak-to-trough ratios are clearly separated in the two  
668 ends of PC-1 whilst the ascending-to-descending ratios are similar for cycles with a positive  
669 or negative score in PC-1. This is consistent with the normalised waveforms summarising  
670 PC-1 in Figure 10A. PC-2 also shows the expected separation of ascending-to-descending  
671 ratios by PC score, whilst the peak-to-trough ratios are unchanged. Whilst PC-3 and PC-4  
672 describe around 10% of shape variability, they are not characterised by the control point  
673 analyses. Neither peak-to-trough ratios nor ascending-to-descending ratios are changed by PC  
674 score for PC-3 or PC-4. These shape profiles are robustly identified by the phase-aligned  
675 instantaneous frequency method but are not distinguished by these control point-based  
676 metrics as the shape distortions in PC-3 and PC-4 occur between the four specified control  
677 points.

678

679 A general linear model was used to quantify the relationship between the different shape  
680 motifs and theta amplitude, theta duration and mouse movement speed. This regression is  
681 computed separately for each PC and the resulting parameter estimates converted into t-  
682 statistics. PC-1 codes for changes in average instantaneous frequency across the cycle with a

683 small shape distortion around the descending edge. This PC has a strong relationship with  
684 cycle duration and amplitude but no significant covariation with movement speed. Longer  
685 and higher amplitude cycles tend to have more positive scores in PC-1 relating to wide peak  
686 shapes. PC-2 has a strong relationship with duration and movement speed. Specifically,  
687 cycles with elongated descending edges have longer cycle durations and are more likely to  
688 occur during fast animal movement. PC-3 shows significant covariance with cycle amplitude.  
689 High amplitude cycles tend to have shapes in which instantaneous frequency is relatively  
690 high just before the peak or trough. Finally, PC-4 varies strongly with duration and weakly  
691 with movement speed. Cycles with flatter curvatures around the extrema have longer cycle  
692 durations and are less likely to occur during faster animal movement.

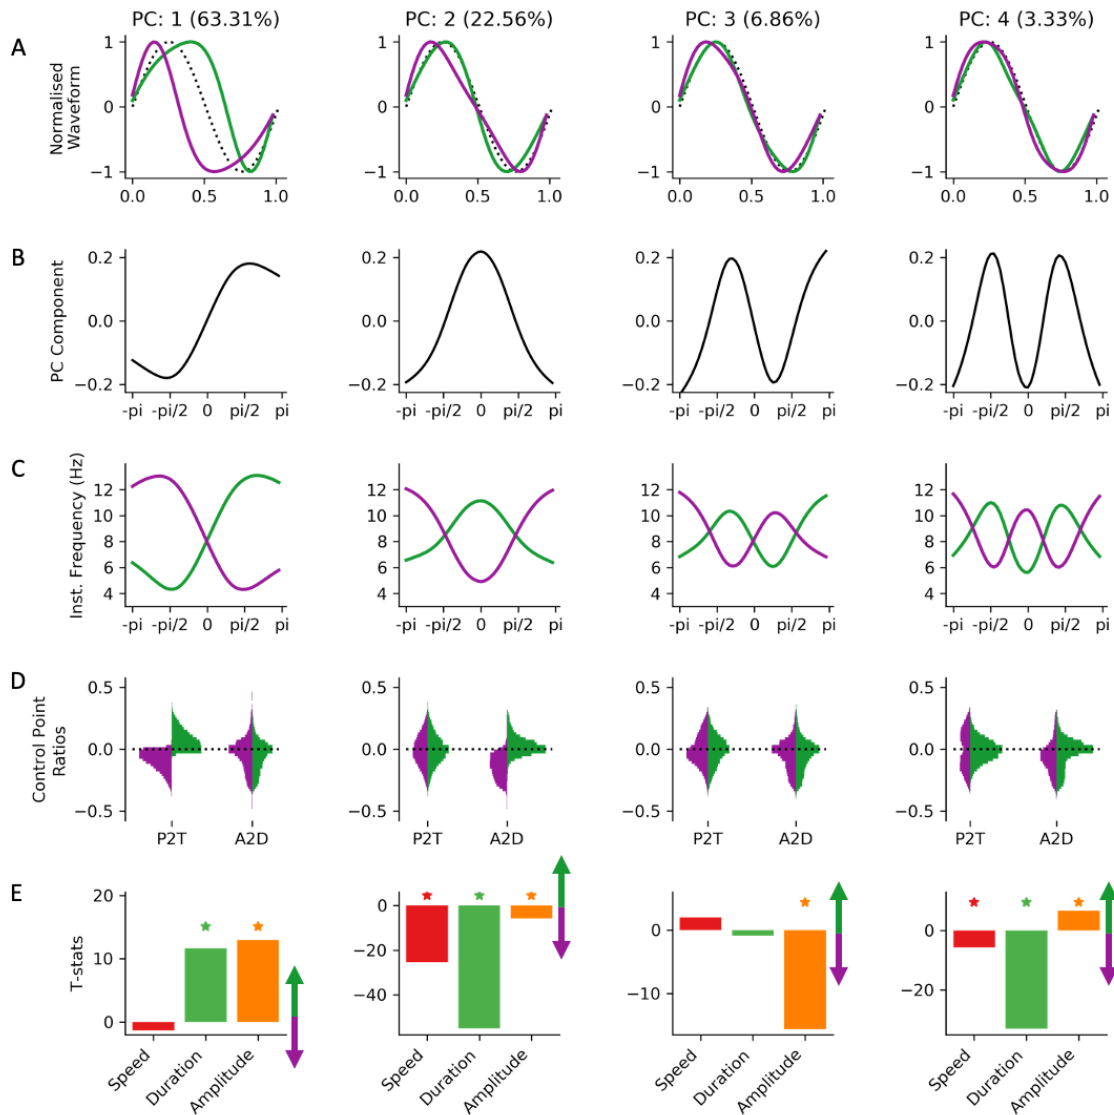

693

694 **Figure 10: Shape motifs in hippocampal theta and their relation to movement speed.**

695

696 A : The normalised waveforms for the first four shape motifs identified from a PCA across  
 697 all phase-aligned instantaneous frequency profiles. Waveforms for positive PC scores are  
 698 shown in purple and waveforms for negative scores shown in green with a sinusoid for  
 699 reference (black dotted line).

700 B : PC for each motif.

701 C : Instantaneous frequency profiles of each shape motif created by multiplying the PC shape  
 702 in 'B' with the maximum or minimum observed PC score for that PC and adding the mean.  
 703 Purple profiles represent the positive end of the score distribution and green profiles represent  
 704 the negative end.

705 D : Control-point ratios for cycles split by the sign of the PC score. Purple profiles represent  
 706 the positive end of the score distribution and green profiles represent the negative end.

707 E : t-value of a GLM modelling the PC score for each motif as a function of movement  
 708 speed, theta cycle duration and theta cycle amplitude. Asterisks indicate statistical  
 709 significance at  $p > 0.01$  as identified by non-parametric permutations.

## 710 **4: Discussion**

711

712 Non-sinusoidal waveforms are often visible by eye in raw LFP traces of electrophysiological  
713 datasets, yet discovering and quantifying these non-sinusoidal and non-linear features present  
714 substantial analytic challenges. We utilise within-cycle variability in instantaneous frequency  
715 to describe distortions in waveform (Huang et al., 2009). Further, we introduce phase-  
716 alignment as a solution to comparing full-resolution waveforms between cycles of different  
717 durations. Taken together, we establish that the phase-aligned instantaneous frequency profile  
718 of an oscillation provides a flexible framework for complete characterisation of oscillatory  
719 waveform shape. We demonstrate the utility of this approach by applying it to simulated data  
720 and LFP recordings of theta oscillations of behaving mice.

721

722 In real data, we observed that theta oscillations have, on average, a fast-ascending and slow  
723 descending waveform, in line with previous reports (Belluscio et al., 2012; Buzsáki et al.,  
724 1986, 1985; Cole and Voytek, 2019). Though this average shape is robust across many  
725 cycles, recording sessions and animals; the shape of individual cycles is highly variable. We  
726 characterise this variability using PCA to identify a range of shape components, or ‘shape  
727 motifs’, which maximally explain the variability in the dataset. The first two PCs quantify the  
728 relative durations of the peak and trough (PC-1) and the ascending to descending edge (PC-  
729 2). These PCs broadly map onto the features described by the peak-to-trough and ascending-  
730 to-descending control point ratios. We show that these theta shape PCs have distinct patterns  
731 of covariation with movement speed, theta amplitude and theta cycle duration. Critically, we  
732 show that though PC-2 describes less variability overall, it most clearly co-varies with  
733 movement speed.

734

735 PC-3 and PC-4 capture more complex waveform shapes. We show that the curvature around  
736 the extrema of the waveform shape (PC-4) is wider in theta cycles occurring during faster  
737 animal movement. This shape is naturally described by instantaneous frequency but not  
738 visible to standard ascending-to-descending and peak-to-trough control-point ratios. More  
739 generally, if the waveform shape of interest is known *a priori*, it is possible to construct  
740 specific control point-based measures so that the waveform shape can be identified. For  
741 instance, waveform sharpness can be explored by looking at the differential between the  
742 extrema and the samples 5ms before and after (Cole et al., 2017). However, in real data, we  
743 may not know the waveform shape of interest *a priori*, implying that many separate metrics  
744 may need to be computed for each cycle. In contrast, the phase-aligned instantaneous  
745 frequency can quantify any waveform shape as a within-cycle instantaneous frequency sweep  
746 without pre-specifying the features which may be of interest.

747

748 The present results demonstrate that single-cycle dynamics in oscillations can be  
749 meaningfully estimated using phase-aligned instantaneous frequency, and that specific shape  
750 motifs are differentially related to the wider electrophysiological (theta amplitude and  
751 duration) and behavioural (movement speed) context. Future models of theta function may  
752 consider these dynamics in waveform shape that deviate from a canonical sinusoidal theta

753 template. Given that many sub-processes occur preferentially at different parts of the theta  
754 cycle (Klausberger and Somogyi, 2008), we hypothesise that shape distortion may indicate or  
755 reflect a change in the underlying theta-phase-nested sub-processes.

756

757 The outlined approach requires that each cycle is smooth in both its waveform and phase  
758 profiles, as any jumps or discontinuities will lead to noisy or even negative instantaneous  
759 frequency estimates. If the cycle is smooth, we can characterise very large distortions in  
760 waveform shape as within-cycle dynamics in instantaneous frequency. Finally, we assume  
761 that the features being analysed are well described as oscillations. If the features are non-  
762 sinusoidal and non-oscillatory, such as spiking activity, then descriptions using the language  
763 of frequency may not be appropriate. With these improvements and caveats in hand, this  
764 approach is readily generalisable to other datasets and provides a flexible framework for  
765 investigating waveform shape oscillating systems.

766

767 In conclusion, the full-cycle waveform of single cycles of hippocampal theta can be  
768 quantified and explored with phase-aligned instantaneous frequency. We use this approach to  
769 confirm the characteristic fast-ascending waveform of theta oscillations; and to additionally  
770 reveal that this is highly variable on the single-cycle level. Moreover, we are able to link this  
771 variability with behavioural and electrophysiological states, suggesting that waveform shape  
772 is a relevant feature of neuronal oscillations alongside frequency, phase and amplitude.  
773 Finally, whilst we have illustrated this approach with hippocampal theta oscillations, it is  
774 likely that this methodology will readily generalise to neuronal oscillation in other brain  
775 regions, frequency bands and contexts.



## 776 **5: Acknowledgments & Funding**

777

778 The authors would like to thank Catharina Zich for discussion of the manuscript. This  
779 project was supported by the Medical Research Council (RG94383/RG89702) and by the  
780 NIHR Oxford Health Biomedical Research Centre. The Wellcome Centre for Integrative  
781 Neuroimaging is supported by core funding from the Wellcome Trust (203139/Z/16/Z).  
782 V.L.d.S. and D.D. are supported by the Medical Research Council UK (Programmes  
783 MC\_UU\_12024/3 and MC\_UU\_00003/4 to D.D.) ACN is supported by the Wellcome  
784 Trust (104571/Z/14/Z) and James S. McDonnell foundation (220020448). MWW is  
785 supported by the Wellcome Trust (106183/Z/14/Z; 215573/Z/19/Z). ACN and MWW are  
786 further supported by an EU European Training Network grant (euSSN; 860563).

787

788 This research was funded in whole, or in part, by the Wellcome Trust. For the purpose of  
789 Open Access, the author has applied a CC-BY public copyright licence to any Author  
790 Accepted Manuscript version arising from this submission.

791

## 792 **6: Author contributions**

793

794 Conceptualisation: AJQ, VLdS, NH, CHJ, WKL, JRY, ACN, DD and MWW.

795 Methodology: AJQ, VLdS, NH, CHJ, WKL, JRY, ACN, DD and MWW.

796 Resources: VLdS, ACN, DD and MWW.

797 Investigation: AJQ, VLdS, DD and MWW.

798 Formal analysis: AJQ.

799 Software: AJQ.

800 Visualisation: AJQ.

801 Writing Original Draft: AJQ, VLdS, ACN, DD and MWW.

802 Writing Review & Edit: AJQ, VLdS, NH, CHJ, WKL, JRY, ACN, DD and MWW.

803 Supervision: ACN and MWW.

804 Funding Acquisition: DD, ACN and MWW

## 805 7: References

- 806 Amzica, F., Steriade, M., 1998. Electrophysiological correlates of sleep delta waves.  
807 Electroencephalogr. Clin. Neurophysiol. 107, 69–83. [https://doi.org/10.1016/s0013-](https://doi.org/10.1016/s0013-4694(98)00051-0)  
808 4694(98)00051-0
- 809 Bartz, S., Avarvand, F.S., Leicht, G., Nolte, G., 2019. Analyzing the waveshape of brain  
810 oscillations with bicoherence. *NeuroImage* 188, 145–160.  
811 <https://doi.org/10.1016/j.neuroimage.2018.11.045>
- 812 Belluscio, M.A., Mizuseki, K., Schmidt, R., Kempster, R., Buzsáki, G., 2012. Cross-  
813 Frequency Phase–Phase Coupling between Theta and Gamma Oscillations in the  
814 Hippocampus. *J. Neurosci.* 32, 423–435. [https://doi.org/10.1523/JNEUROSCI.4122-](https://doi.org/10.1523/JNEUROSCI.4122-11.2012)  
815 11.2012
- 816 Boashash, B., 1992. Estimating and interpreting the instantaneous frequency of a signal. I.  
817 Fundamentals. *Proc. IEEE* 80, 520–538. <https://doi.org/10.1109/5.135376>
- 818 Buzsáki, G., Czopf, J., Kondákor, I., Kellényi, L., 1986. Laminar distribution of hippocampal  
819 rhythmic slow activity (RSA) in the behaving rat: Current-source density analysis,  
820 effects of urethane and atropine. *Brain Res.* 365, 125–137.  
821 [https://doi.org/10.1016/0006-8993\(86\)90729-8](https://doi.org/10.1016/0006-8993(86)90729-8)
- 822 Buzsáki, G., Rappelsberger, P., Kellényi, L., 1985. Depth profiles of hippocampal rhythmic  
823 slow activity (‘theta rhythm’) depend on behaviour. *Electroencephalogr. Clin.*  
824 *Neurophysiol.* 61, 77–88. [https://doi.org/10.1016/0013-4694\(85\)91075-2](https://doi.org/10.1016/0013-4694(85)91075-2)
- 825 Canolty, R.T., Edwards, E., Dalal, S.S., Soltani, M., Nagarajan, S.S., Kirsch, H.E., Berger,  
826 M.S., Barbaro, N.M., Knight, R.T., 2006. High Gamma Power Is Phase-Locked to  
827 Theta Oscillations in Human Neocortex. *Science* 313, 1626–1628.  
828 <https://doi.org/10.1126/science.1128115>
- 829 Cohen, M.X., 2014. Fluctuations in Oscillation Frequency Control Spike Timing and  
830 Coordinate Neural Networks. *J. Neurosci.* 34, 8988–8998.  
831 <https://doi.org/10.1523/JNEUROSCI.0261-14.2014>
- 832 Cole, S., Voytek, B., 2019. Cycle-by-cycle analysis of neural oscillations. *J. Neurophysiol.*  
833 <https://doi.org/10.1152/jn.00273.2019>
- 834 Cole, S.R., van der Meij, R., Peterson, E.J., de Hemptinne, C., Starr, P.A., Voytek, B., 2017.  
835 Nonsinusoidal Beta Oscillations Reflect Cortical Pathophysiology in Parkinson’s  
836 Disease. *J. Neurosci. Off. J. Soc. Neurosci.* 37, 4830–4840.  
837 <https://doi.org/10.1523/JNEUROSCI.2208-16.2017>
- 838 Cole, S.R., Voytek, B., 2017. Brain Oscillations and the Importance of Waveform Shape.  
839 *Trends Cogn. Sci.* 21, 137–149. <https://doi.org/10.1016/j.tics.2016.12.008>
- 840 Deering, R., Kaiser, J.F., 2005. The use of a masking signal to improve empirical mode  
841 decomposition, in: *Proceedings. (ICASSP ’05). IEEE International Conference on*  
842 *Acoustics, Speech, and Signal Processing, 2005. Presented at the Proceedings.*  
843 *(ICASSP ’05). IEEE International Conference on Acoustics, Speech, and Signal*  
844 *Processing, 2005.*, p. iv/485-iv/488 Vol. 4. <https://doi.org/10.1109/TASSP.1987.1165090>
- 845 Elgar, S., 1987. Relationships involving third moments and bispectra of a harmonic process.  
846 *IEEE Trans. Acoust. Speech Signal Process.* 35, 1725–1726.  
847 <https://doi.org/10.1109/TASSP.1987.1165090>
- 848 Feynman, R.P., Leighton, R.B., Sands, M.L., 2011. *The Feynman lectures on physics*, New  
849 millennium ed. ed. Basic Books, New York.
- 850 Fosso, O.B., Molinas, M., 2017. Method for Mode Mixing Separation in Empirical Mode  
851 Decomposition. *ArXiv170905547 Stat.*
- 852 Harris, C.R., Millman, K.J., van der Walt, S.J., Gommers, R., Virtanen, P., Cournapeau, D.,  
853 Wieser, E., Taylor, J., Berg, S., Smith, N.J., Kern, R., Picus, M., Hoyer, S., van

- 854 Kerkwijk, M.H., Brett, M., Haldane, A., del Río, J.F., Wiebe, M., Peterson, P.,  
855 Gérard-Marchant, P., Sheppard, K., Reddy, T., Weckesser, W., Abbasi, H., Gohlke,  
856 C., Oliphant, T.E., 2020. Array programming with NumPy. *Nature* 585, 357–362.  
857 <https://doi.org/10.1038/s41586-020-2649-2>
- 858 Hasselmo, M.E., Bodelón, C., Wyble, B.P., 2002. A Proposed Function for Hippocampal  
859 Theta Rhythm: Separate Phases of Encoding and Retrieval Enhance Reversal of Prior  
860 Learning. *Neural Comput.* 14, 793–817.  
861 <https://doi.org/10.1162/089976602317318965>
- 862 Huang, N.E., Lo, M.-T., WU, Z.-H., CHEN, X.-Y., 2014. Method for quantifying and  
863 modeling degree of nonlinearity, combined nonlinearity, and nonstationarity.  
864 US8732113B2.
- 865 Huang, N.E., Shen Zheng, Long Steven R., Wu Manli C., Shih Hsing H., Zheng Quanan, Yen  
866 Nai-Chyuan, Tung Chi Chao, Liu Henry H., 1998. The empirical mode  
867 decomposition and the Hilbert spectrum for nonlinear and non-stationary time series  
868 analysis. *Proc. R. Soc. Lond. Ser. Math. Phys. Eng. Sci.* 454, 903–995.  
869 <https://doi.org/10.1098/rspa.1998.0193>
- 870 Huang, N.E., Wu, Z., Long, S.R., Arnold, K.C., Chen, X., Blank, K., 2009. On instantaneous  
871 frequency. *Adv. Adapt. Data Anal.* 01, 177–229.  
872 <https://doi.org/10.1142/S1793536909000096>
- 873 Hunter, J.D., 2007. Matplotlib: A 2D Graphics Environment. *Comput. Sci. Eng.* 9, 90–95.  
874 <https://doi.org/10.1109/MCSE.2007.55>
- 875 Klausberger, T., Somogyi, P., 2008. Neuronal diversity and temporal dynamics: the unity of  
876 hippocampal circuit operations. *Science* 321, 53–57.  
877 <https://doi.org/10.1126/science.1149381>
- 878 Liang, H.L., Bressler, S.L., Buffalo, E.A., Desimone, R., Fries, P., 2005. Empirical mode  
879 decomposition of field potentials from macaque V4 in visual spatial attention. *Biol.*  
880 *Cybern.* 92, 380–392. <https://doi.org/10.1007/s00422-005-0566-y>
- 881 Lopes-dos-Santos, V., van de Ven, G.M., Morley, A., Trouche, S., Campo-Urriza, N.,  
882 Dupret, D., 2018. Parsing Hippocampal Theta Oscillations by Nested Spectral  
883 Components during Spatial Exploration and Memory-Guided Behavior. *Neuron* 100,  
884 940-952.e7. <https://doi.org/10.1016/j.neuron.2018.09.031>
- 885 Nelli, S., Itthipuripat, S., Srinivasan, R., Serences, J.T., 2017. Fluctuations in instantaneous  
886 frequency predict alpha amplitude during visual perception. *Nat. Commun.* 8, 1–12.  
887 <https://doi.org/10.1038/s41467-017-02176-x>
- 888 Quinn, A., Hymers, M., 2020. SAILS: Spectral Analysis In Linear Systems. *J. Open Source*  
889 *Softw.* 5, 1982. <https://doi.org/10.21105/joss.01982>
- 890 Quinn, A., Lopes-dos-Santos, V., Dupret, D., Nobre, A., Woolrich, M., 2021. EMD:  
891 Empirical Mode Decomposition and Hilbert-Huang Spectral Analyses in Python. *J.*  
892 *Open Source Softw.* 6, 2977. <https://doi.org/10.21105/joss.02977>
- 893 Rato, R.T., Ortigueira, M.D., Batista, A.G., 2008. On the HHT, its problems, and some  
894 solutions. *Mech. Syst. Signal Process.*, Special Issue: Mechatronics 22, 1374–1394.  
895 <https://doi.org/10.1016/j.ymssp.2007.11.028>
- 896 Rilling, G., Flandrin, P., 2008. One or Two Frequencies? The Empirical Mode  
897 Decomposition Answers. *IEEE Trans. Signal Process.* 56, 85–95.  
898 <https://doi.org/10.1109/TSP.2007.906771>
- 899 Rudrauf, D., Douiri, A., Kovach, C., Lachaux, J.-P., Cosmelli, D., Chavez, M., Adam, C.,  
900 Renault, B., Martinerie, J., Le Van Quyen, M., 2006. Frequency flows and the time-  
901 frequency dynamics of multivariate phase synchronization in brain signals.  
902 *NeuroImage* 31, 209–227. <https://doi.org/10.1016/j.neuroimage.2005.11.021>

- 903 SciPy 1.0 Contributors, Virtanen, P., Gommers, R., Oliphant, T.E., Haberland, M., Reddy, T.,  
904 Courneau, D., Burovski, E., Peterson, P., Weckesser, W., Bright, J., van der Walt,  
905 S.J., Brett, M., Wilson, J., Millman, K.J., Mayorov, N., Nelson, A.R.J., Jones, E.,  
906 Kern, R., Larson, E., Carey, C.J., Polat, İ., Feng, Y., Moore, E.W., VanderPlas, J.,  
907 Laxalde, D., Perktold, J., Cimrman, R., Henriksen, I., Quintero, E.A., Harris, C.R.,  
908 Archibald, A.M., Ribeiro, A.H., Pedregosa, F., van Mulbregt, P., 2020. SciPy 1.0:  
909 fundamental algorithms for scientific computing in Python. *Nat. Methods* 17, 261–  
910 272. <https://doi.org/10.1038/s41592-019-0686-2>
- 911 Sheremet, A., Burke, S.N., Maurer, A.P., 2016. Movement Enhances the Nonlinearity of  
912 Hippocampal Theta. *J. Neurosci.* 36, 4218–4230.  
913 <https://doi.org/10.1523/JNEUROSCI.3564-15.2016>
- 914 Siapas, A.G., Lubenov, E.V., Wilson, M.A., 2005. Prefrontal Phase Locking to Hippocampal  
915 Theta Oscillations. *Neuron* 46, 141–151. <https://doi.org/10.1016/j.neuron.2005.02.028>
- 916 Trimper, J.B., Stefanescu, R.A., Manns, J.R., 2014. Recognition memory and theta-gamma  
917 interactions in the hippocampus. *Hippocampus* 24, 341–353.  
918 <https://doi.org/10.1002/hipo.22228>
- 919 Tsai, F.-F., Fan, S.-Z., Lin, Y.-S., Huang, N.E., Yeh, J.-R., 2016. Investigating Power  
920 Density and the Degree of Nonlinearity in Intrinsic Components of Anesthesia EEG  
921 by the Hilbert-Huang Transform: An Example Using Ketamine and Alfentanil. *PLOS*  
922 *ONE* 11, e0168108. <https://doi.org/10.1371/journal.pone.0168108>
- 923 van de Ven, G.M., Trouche, S., McNamara, C.G., Allen, K., Dupret, D., 2016. Hippocampal  
924 Offline Reactivation Consolidates Recently Formed Cell Assembly Patterns during  
925 Sharp Wave-Ripples. *Neuron* 92, 968–974.  
926 <https://doi.org/10.1016/j.neuron.2016.10.020>
- 927 Wang, Y., Wang, H., Zhang, Q., 2012. Nonlinear distortion identification based on intra-  
928 wave frequency modulation. *Appl. Math. Inf. Sci.* 6, 689–695.
- 929 Wu, Z., Huang, N.E., 2009. ENSEMBLE EMPIRICAL MODE DECOMPOSITION: A  
930 NOISE-ASSISTED DATA ANALYSIS METHOD. *Adv. Adapt. Data Anal.* 01, 1–  
931 41. <https://doi.org/10.1142/S1793536909000047>
- 932 Yeh, C.-H., Al-Fatly, B., Kühn, A.A., Meidahl, A.C., Tinkhauser, G., Tan, H., Brown, P.,  
933 2020. Waveform changes with the evolution of beta bursts in the human subthalamic  
934 nucleus. *Clin. Neurophysiol.* 131, 2086–2099.  
935 <https://doi.org/10.1016/j.clinph.2020.05.035>

## 937 **8: Supplemental Methods**

938

### 939 **Experimental model and subject details**

940 Animals used were male adult (4–7 months old) C57BL/6J mice (Charles River, UK). All  
941 animals had free access to water and food in a dedicated housing facility with a 12/12 h  
942 light/dark cycle. They shared a cage with their littermates until the surgery. All experiments  
943 involving animals were conducted according to the UK Animals (Scientific Procedures) Act  
944 1986 under personal and project licenses issued by the Home Office following ethical review.  
945

#### 946 **Microdrive implantation**

947 Animals were implanted with a 10-12 tetrode microdrive during a surgical procedure  
948 performed under deep anesthesia using isoflurane (0.5–2 %) and oxygen (2 l/min), with  
949 analgesia (0.1 mg/kg vetergesic) provided before and after. Tetrodes were constructed by  
950 twisting together four insulated tungsten wires (12 µm diameter, California Fine Wire) and  
951 shortly heating them to bind them together in a single bundle. Each tetrode was attached to a  
952 M1.0 screw to enable their independent movement. The drive was implanted under  
953 stereotaxic control in reference to bregma (Lopes-dos-Santos et al., 2018). Tetrodes were  
954 initially implanted above the CA1 pyramidal layer and their exposed parts were covered with  
955 paraffin wax. The drive was then secured to the skull using dental cement. For extra stability,  
956 stainless-steel anchor screws had first been inserted into the skull. Two of the anchor screws,  
957 which were inserted above the cerebellum, were attached to 50 µm tungsten wires (California  
958 Fine Wire) and served as ground and reference electrodes during the recordings. The  
959 placement of the tetrodes in dorsal CA1 was confirmed by the electrophysiological profile of  
960 the local field potentials in the hippocampal ripple frequency band.  
961

961

#### 962 **Recording procedures**

963 Recordings commenced following full recovery from the surgery. Each animal was  
964 connected to the recording apparatus and familiarized with a high-walled box containing  
965 home cage bedding and with one open-field enclosure (the familiar enclosure) over a period  
966 of approximately seven days. During this period, tetrodes were gradually lowered to the  
967 stratum oriens of the hippocampal CA1. On the morning of each recording day, tetrodes were  
968 further lowered into the pyramidal cell layer in search of multi-unit spiking activity and  
969 sharp-wave/ripple events (van de Ven et al., 2016). Tetrodes were not moved for at least 1.5  
970 h before recordings started. For each recording day, the animal was exposed to various open-  
971 field enclosures including the familiar, which the animal had repeatedly been exposed to  
972 before, and a novel enclosure the animal had never seen before. The open-field enclosures  
973 differed in shape and in the cue-cards that lined some of the walls. The present study includes  
974 a total of six LFP recordings from three mice (including three familiar enclosure and three  
975 novel enclosure sessions). At the end of each recording day, tetrodes were raised to the  
976 stratum oriens to avoid damaging the pyramidal layer overnight.  
977

977

978 Multichannel data acquisition and position tracking  
979 The extracellular signals from the electrodes were buffered on the head of the animal (unity  
980 gain op-amps, Axona Ltd) and transmitted over a single strand of litz wire to a dual stage  
981 amplifier and band pass filter (gain 1000, pass band 0.1 Hz to 5 kHz; Sensorium Inc.,  
982 Charlotte, VT), or (in other setups) the electrode signals were amplified, multiplexed, and  
983 digitized using a single integrated circuit located on the head of the animal (RHD2164, Intan  
984 Technologies, Los Angeles; pass band 0.09 Hz to 7.60 kHz). The amplified and filtered  
985 electrophysiological signals were digitized at 20 kHz and saved to disk along with the  
986 synchronization signals from the position tracking. LFPs were further down sampled to 1250  
987 Hz for all subsequent analyses. In order to track the location of the animal three LED clusters  
988 were attached to the electrode casing and captured at 39 frames per second by an overhead  
989 color camera.



## 990 8.2: Mask sift parameter robustness

991

992 We ran a supplemental analysis to ensure that our LFP phase-aligned instantaneous  
993 frequency results were robust to moderate changes in the masking parameters. 5 minutes of  
994 data from a single data recording were repeatedly sifted with jittered masked frequencies. 25  
995 sifts were computed for each of three mask frequency jitter values of 10%, 20% and 30%.  
996 For example, in the 10% condition each iteration each mask frequency was randomised to a  
997 value drawn from a uniform distribution between 90% and 110% of the original frequency.  
998 The results showed that jitter of 10% has a small effect on the phase-aligned instantaneous  
999 frequency values, though the centre frequency and shape profile remain consistent across all  
1000 iterations. Jitters of 20% and 30% have larger effects on both centre frequency and shape on  
1001 individual iterations, suggesting that some mask frequency combinations are having a large  
1002 impact on the results. Despite this, the average across all iterations remains strikingly similar.  
1003 These results indicate that the main waveform results are robust to moderate changes to the  
1004 masking parameters.

1005

1006

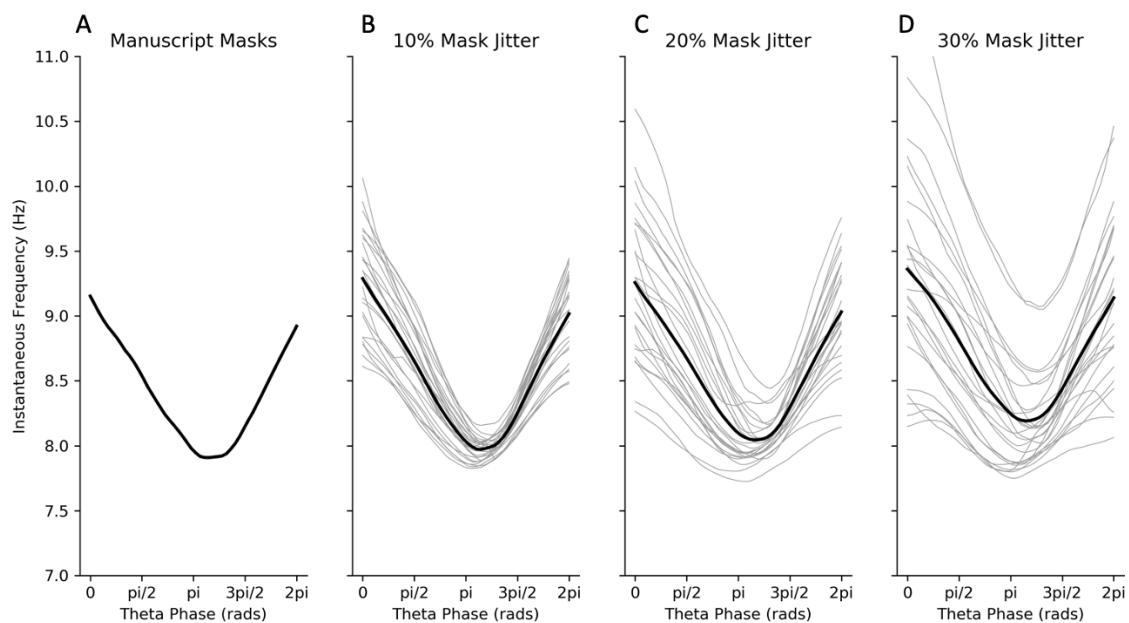

1007

1008 **Figure S1 – Phase-aligned instantaneous frequency values across a range of jittered**  
1009 **mask frequencies.**

1010 A: Instantaneous frequency for mask frequencies used in main analysis

1011 B: Instantaneous frequency for mask frequencies jittered by +/- 10%. Individual iterations are  
1012 shown in grey and the average in black.

1013 C: As B for jitter of +/- 20%

1014 D: As B for jitter of +/- 30%



### 1015 8.3: PCA component selection and reproducibility

1016

1017 The principal components analysis results were validated by computing the split half  
1018 reproducibility of the PC components across 500 splits. The correlation of component shapes  
1019 between the separate halves and the proportion of variance explained was computed for each  
1020 split. The distribution of explained variance for each mode was highly reproducible across  
1021 the 500 splits and the first four components explained more than 5% of overall variance  
1022 (Figure S2A). The PC component shapes were also highly reliable for the first four  
1023 components. The average correlation between components for the two halves of each split  
1024 was over  $r=0.95$  for the first 5 PCs. Based on these comparisons we carried the first four  
1025 components forward for further analyses.

1026

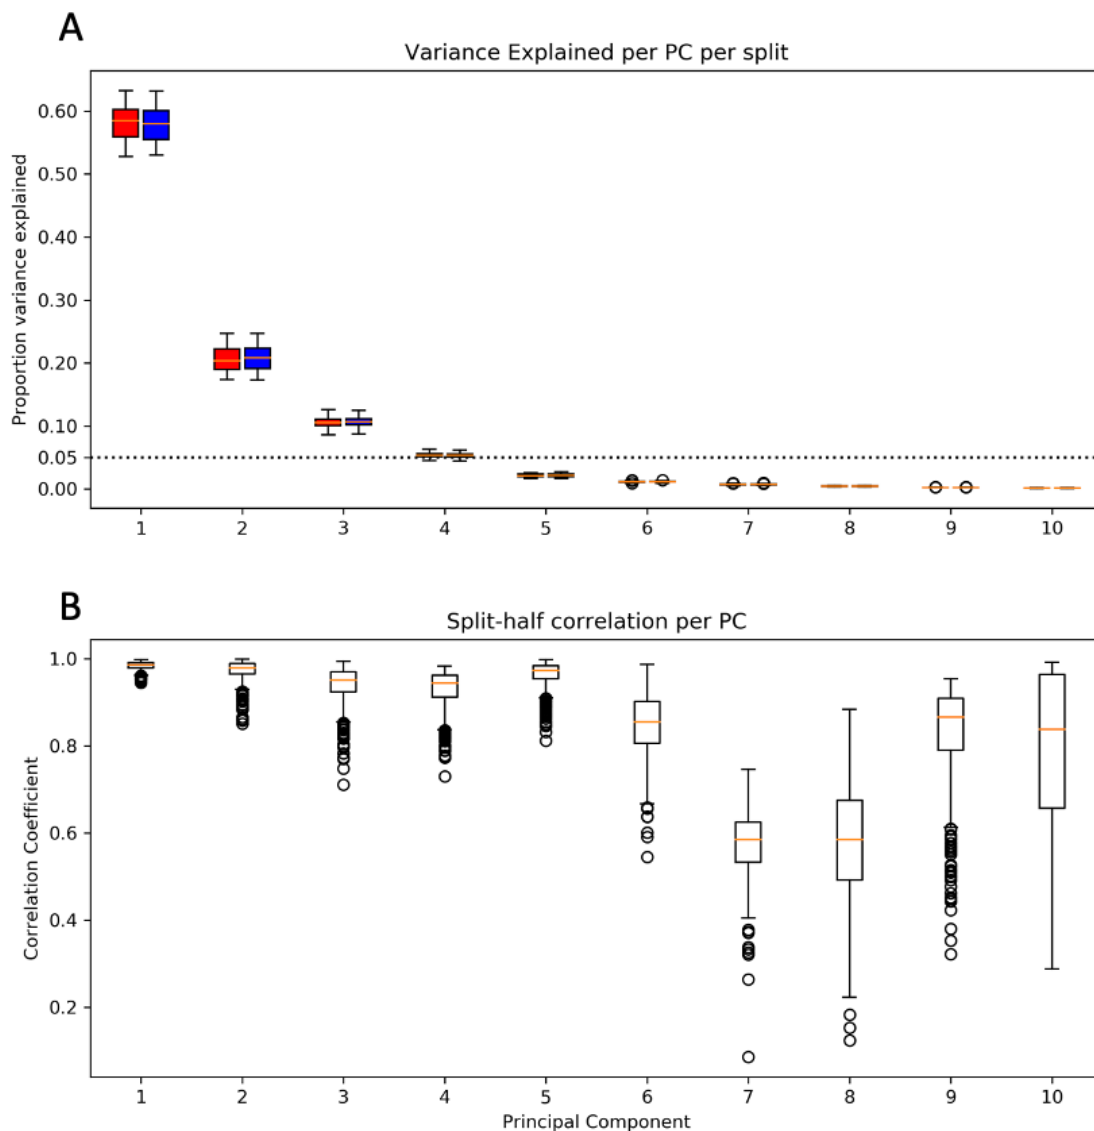

1027

1028 **Figure S2 – the variance explained and split-half correlation distributions across 500**  
1029 **split half iterations.**

1030 A: the variance explained by each component for each half over the 500 splits. The first half  
1031 is in red and the second half in blue.

1032 B: The correlation in the component shape between the first and second half of the 500 splits.
